# Supplementary material
Source: PubMed Central journal article supplement (PMC2756558)
Supplement: mmc1.pdf [file mmc1.pdf]

## Clinical Diagnostics in Human Genetics with Semantic Similarity Searches in Ontologies

Sebastian Köhler, Marcel H. Schulz, Peter Krawitz, Sebastian Bauer, Sandra Dölken, Claus E. Ott, Christine Mundlos, Denise Horn, Stefan Mundlos, Peter N. Robinson

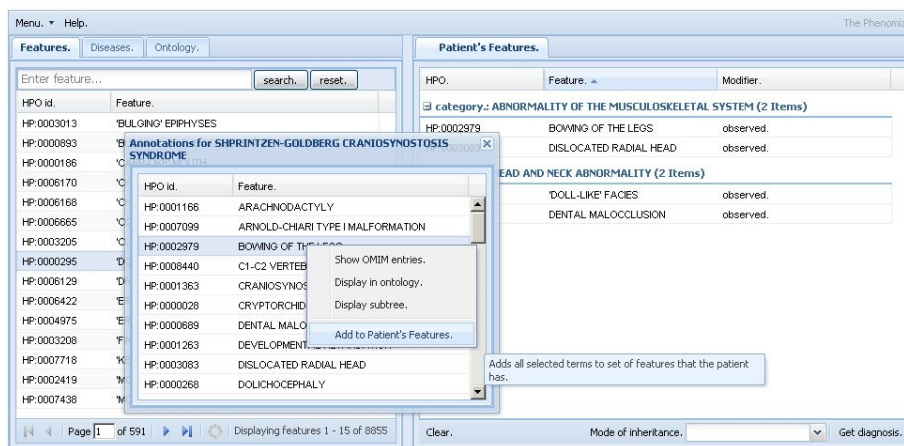

Figure S1: Screenshot of the *Phenomizer* web-application. We have implemented our methods using Web 2.0 technologies including the Google Web Toolkit (GWT) (<http://code.google.com/webtoolkit/>) and GWT-Ext (<http://www.gwt-ext.com>) in the form of a freely available, web-application called the *Phenomizer*, which can be used for searching for Mendelian disorders. The data is fetched asynchronously (AJAX) from our Tomcat-webserver, where most of the computations are performed. Thus, for the user our application is very lightweight and requires no installation. Users require just a standard web-browser such as Firefox, Internet Explorer ( $\geq$  IE6), or Safari and an internet connection. The application is thus independent of the user's operating system. For each query, the similarity to each disease in the database (currently, the 4,813 diseases listed in OMIM) is calculated. Therefore, we report multiple-testing corrected  $P$ -values. The default multiple-correction method for the *Phenomizer* is that of Benjamini and Hochberg [1], but users can choose among several other multiple-testing corrections, which are calculated using R [2] on the server side.

| <i>Description</i> | <i>Numerical Frequency</i> |
|--------------------|----------------------------|
| very rare          | 0.01                       |
| rare               | 0.05                       |
| occasional         | 0.075                      |
| main               | 0.25                       |
| frequent           | 0.33                       |
| typical            | 0.5                        |
| common             | 0.5                        |
| hallmark           | 0.9                        |

Table S1: **Conversion of textual description of feature-frequencies into numerical values.** In some cases, the literature consulted to construct the frequency tables shown in Tables S2-S45 did not contain numerical estimates of the frequencies of clinical features, but rather general descriptions of their frequency such as “common” or “rare”. For these features, we used the numerical values given in this table.

| HPO Term                                                           | Term ID                                                   | Frequency  |
|--------------------------------------------------------------------|-----------------------------------------------------------|------------|
| Delayed motor milestones                                           | HP:0002130                                                | 100.00%    |
| Absent speech                                                      | HP:0001617                                                | 100.00%    |
| Gait ataxia                                                        | HP:0007240                                                | 100.00%    |
| Severe mental retardation                                          | HP:0001261                                                | 100.00%    |
| EEG abnormalities                                                  | HP:0002353                                                | 92.00%     |
| Blue irides                                                        | HP:0000635                                                | 88.00%     |
| Seizures                                                           | HP:0001250                                                | 86.00%     |
| Blond hair                                                         | HP:0002214                                                | 65.00%     |
| Strabismus                                                         | HP:0000486                                                | 42.00%     |
| Hypopigmentation of the skin                                       | HP:0001010                                                | 39.00%     |
| Mild cortical atrophy on CT or MRI                                 | HP:0006823                                                | 33.00%     |
| Deep set eyes                                                      | HP:0000490                                                | main       |
| Maxillary hypoplasia                                               | HP:0000327                                                | main       |
| Microbrachycephaly                                                 | HP:0002258                                                | main       |
| Hypotonia                                                          | HP:0001318                                                | main       |
| Macrostomia <i>and</i> Macroglossia <i>and</i> Widely spaced teeth | HP:0000181 <i>and</i> HP:0000203<br><i>and</i> HP:0000687 | main       |
| Mandibular prognathism                                             | HP:0000303                                                | main       |
| Inappropriate laughter                                             | HP:0000748                                                | main       |
| Scoliosis                                                          | HP:0002650                                                | occasional |
| Hyperreflexia                                                      | HP:0001282                                                | occasional |
| Nystagmus                                                          | HP:0000639                                                | occasional |

Inheritance: Isolated cases (Imprinting defect)

Table S2: **Angelman Syndrome [MIM 105830]**. Feature frequencies according to [3].

| HPO Term                            | Term ID    | Frequency |
|-------------------------------------|------------|-----------|
| Abnormality of the pyramidal tracts | HP:0002062 | 68/69     |
| Cerebral atrophy, progressive       | HP:0002422 | 66/69     |
| Increased CSF interferon alpha      | HP:0009709 | 31/33     |
| Basal ganglia calcifications        | HP:0002135 | 64/69     |
| Microcephaly                        | HP:0000252 | 59/69     |
| Chronic CSF lymphocytosis           | HP:0009704 | 51/65     |
| Leukoencephalopathy                 | HP:0002352 | 53/69     |
| Extrapyramidal signs                | HP:0002071 | 42/69     |
| Hepatosplenomegaly                  | HP:0001433 | 13/23     |
| Nystagmus                           | HP:0000639 | 11/21     |
| Feeding difficulties                | HP:0002022 | 35/69     |
| Encephalopathy, progressive         | HP:0002448 | typical   |
| Truncal hypotonia                   | HP:0002320 | typical   |
| Poor head control                   | HP:0002421 | typical   |
| Seizures                            | HP:0001250 | 50%       |
| Deep white matter hypodensities     | HP:0007321 | typical   |
| Dystonia                            | HP:0001332 | typical   |
| Strabismus                          | HP:0000486 | 6/21      |
| Chilblain lesions                   | HP:0009710 | 5/21      |
| Liver dysfunction                   | HP:0004394 | 11/69     |
| Fever                               | HP:0001945 | 11/69     |

Inheritance: Autosomal recessive

Table S3: **Aicardi-Goutières Syndrome**. Feature frequencies according to [4] and [5].

| HPO Term                                   | Term ID    | Frequency  |
|--------------------------------------------|------------|------------|
| Carpal bone fusion                         | HP:0001192 | 100.00%    |
| Absent or hypoplastic thumbs               | HP:0002950 | 100.00%    |
| Absent carpals, metacarpals, and phalanges | HP:0005056 | 100.00%    |
| Craniosynostosis                           | HP:0002685 | 100.00%    |
| Aplasia/hypoplasia of the radius           | HP:0006501 | 77.00%     |
| Short ulna                                 | HP:0002998 | 68.00%     |
| Bowed ulna                                 | HP:0003031 | 68.00%     |
| Low-set, posteriorly rotated ears          | HP:0000368 | 64.00%     |
| Mental retardation                         | HP:0001249 | 50.00%     |
| Micrognathia                               | HP:0000210 | 50.00%     |
| Abnormality of the anus                    | HP:0004378 | 40.00%     |
| Genitourinary abnormality                  | HP:0000119 | 35.00%     |
| Microstomia                                | HP:0000160 | 32.00%     |
| Downward slanting palpebral fissures       | HP:0000494 | 32.00%     |
| Prominent nasal bridge                     | HP:0000426 | 32.00%     |
| Flattened forehead                         | HP:0004425 | 27.00%     |
| cardiac abnormality                        | HP:0001627 | 25.00%     |
| Growth retardation                         | HP:0001510 | main       |
| Sudden death                               | HP:0001699 | 20.00%     |
| spina bifida occulta                       | HP:0003298 | occasional |
| Strabismus                                 | HP:0000486 | occasional |
| hearing loss, conductive                   | HP:0000405 | occasional |
| limited elbow movement                     | HP:0002996 | occasional |
| cleft palate                               | HP:0000175 | occasional |
| myopia                                     | HP:0000545 | occasional |
| bifid uvula                                | HP:0000193 | occasional |
| midfacial capillary hemangioma             | HP:0007611 | occasional |
| rib fusion                                 | HP:0000902 | occasional |
| limited knee movement                      | HP:0005192 | occasional |
| abnormalities of the vertebrae             | HP:0003468 | occasional |
| limited shoulder movement                  | HP:0006467 | occasional |
| polymicrogyria                             | HP:0002126 | occasional |
| Hydrocephalus                              | HP:0000238 | occasional |
| Epicanthal folds                           | HP:0000286 | occasional |
| Seizures                                   | HP:0001250 | occasional |
| scoliosis                                  | HP:0002650 | occasional |
| anomalous splenoportal venous system       | HP:0005201 | occasional |
| choanal stenosis                           | HP:0000452 | occasional |
| Patellar hypoplasia                        | HP:0003065 | occasional |
| Humeral hypoplasia                         | HP:0005792 | occasional |
| hypoplastic nasal alae                     | HP:0000430 | occasional |
| optic atrophy                              | HP:0000648 | occasional |
| agenesis of corpus callosum                | HP:0001274 | occasional |

Inheritance: autosomal recessive

Table S4: **Baller Gerold Syndrome** [MIM 218600]. Feature frequencies according to [3].

| HPO Term                                         | Term ID                          | Frequency  |
|--------------------------------------------------|----------------------------------|------------|
| Retinal dystrophy                                | HP:0000556                       | 100.00%    |
| Abnormality of the kidneys                       | HP:0000077                       | 95.00%     |
| Small penis <i>and</i> Decreased testicular size | HP:0000038 <i>and</i> HP:0008734 | 88.00%     |
| Obesity                                          | HP:0001513                       | 83.00%     |
| Speech delay                                     | HP:0002117                       | 77.00%     |
| Myopia                                           | HP:0000545                       | 75.00%     |
| Astigmatism                                      | HP:0000483                       | 63.00%     |
| Hypertension                                     | HP:0000822                       | 60.00%     |
| Postaxial polydactyly                            | HP:0001162                       | 58.00%     |
| Nystagmus                                        | HP:0000639                       | 52.00%     |
| Brachydactyly                                    | HP:0001156                       | 50.00%     |
| Behavioral disturbances                          | HP:0000715                       | 33.00%     |
| Cataract <i>or</i> Congenital primary aphakia    | HP:0000518 <i>or</i> HP:0007707  | 30.00%     |
| Short, broad feet                                | HP:0001773                       | main       |
| Asthma                                           | HP:0002099                       | 25.00%     |
| Poor coordination <i>and</i> Gait imbalance      | HP:0002370 <i>and</i> HP:0002141 | main       |
| Syndactyly                                       | HP:0001159                       | main       |
| Mental deficiency                                | HP:0001267                       | main       |
| Glaucoma                                         | HP:0000501                       | 22.00%     |
| Retinitis pigmentosa                             | HP:0000510                       | 8.00%      |
| Clinodactyly                                     | HP:0001157                       | occasional |
| Macrocephaly                                     | HP:0000256                       | occasional |
| Cardiac abnormality                              | HP:0001627                       | occasional |
| Diabetes insipidus                               | HP:0000873                       | occasional |
| Biliary tract abnormality                        | HP:0001080                       | occasional |
| Diabetes mellitus                                | HP:0000819                       | occasional |
| Vaginal atresia                                  | HP:0000148                       | occasional |
| Ataxia                                           | HP:0001251                       | occasional |
| Hirsutism                                        | HP:0001007                       | occasional |
| Dental abnormality                               | HP:0000164                       | occasional |
| Hearing loss                                     | HP:0000365                       | occasional |
| Abnormality of the ovaries                       | HP:0000137                       | occasional |
| Hepatic fibrosis                                 | HP:0001395                       | occasional |

Inheritance: autosomal recessive (heterogeneous, sometimes triallelic inheritance)

Table S5: **Bardet Biedl Syndrome** [MIM 209900]. Feature frequencies according to [3] and [6].

| HPO Term                                                                                                     | Term ID                          | Frequency                |
|--------------------------------------------------------------------------------------------------------------|----------------------------------|--------------------------|
| Low posterior hairline                                                                                       | HP:0002162                       | 92.00%                   |
| Low-set posteriorly rotated ears <i>and/or</i> Overfolded ears                                               | HP:0000368                       | <i>and/or</i> 38/42      |
| <i>and/or</i> Malformed ears                                                                                 | HP:0001758                       | <i>and/or</i>            |
|                                                                                                              | HP:0000377                       |                          |
| Abnormality of upper lip                                                                                     | HP:0000177                       | 90.00%                   |
| Nasolacrimal duct obstruction                                                                                | HP:0000579                       | 29/39                    |
| Male: Undescended testes                                                                                     | HP:0000797                       | 73.00%                   |
| Proximally placed thumbs                                                                                     | HP:0001170                       | 72.00%                   |
| Short neck                                                                                                   | HP:0000470                       | 66.00%                   |
| Elbow contractures                                                                                           | HP:0002987                       | 64.00%                   |
| Hearing loss                                                                                                 | HP:0000365                       | 60.00%                   |
| Telecanthus                                                                                                  | HP:0000506                       | 58.00%                   |
| Atrophic skin <i>and</i> Aplasia cutis congenita <i>and</i> Scarring                                         | HP:0001077 <i>and</i> HP:0001057 | 57.00%                   |
|                                                                                                              | <i>and</i> HP:0000987            |                          |
| Myopia <i>and/or</i> Ptosis <i>and/or</i> Nystagmus                                                          | HP:0000545                       | <i>and/or</i> 57.00%     |
|                                                                                                              | HP:0000508                       | <i>and/or</i>            |
|                                                                                                              | HP:0000639                       |                          |
| Dental abnormalities                                                                                         | HP:0000164                       | 56.00%                   |
| Transverse palmar crease                                                                                     | HP:0000945                       | 51.00%                   |
| Micrognathia                                                                                                 | HP:0000210                       | 50.00%                   |
| Upslanting palpebral fissures                                                                                | HP:0000582                       | 48.00%                   |
| Prenatal growth deficiency                                                                                   | HP:0001515                       | 16/34                    |
| Coloboma                                                                                                     | HP:0000589                       | 16/35                    |
| Microphthalmos <i>or</i> Anophthalmia                                                                        | HP:0000568 <i>or</i> HP:0000528  | 44.00%                   |
| Hypoplastic superior helix                                                                                   | HP:0008559                       | 43.00%                   |
| Mild mental retardation                                                                                      | HP:0001256                       | 15/36                    |
| Postnatal growth retardation                                                                                 | HP:0001514                       | 13/34                    |
| Hearing loss, conductive                                                                                     | HP:0000405                       | 14/38                    |
| Male: Hypospadias                                                                                            | HP:0000047                       | 33.00%                   |
| Strabismus                                                                                                   | HP:0000486                       | 11/36                    |
| Gastroesophageal reflux                                                                                      | HP:0002020                       | 30.00%                   |
| Myopia                                                                                                       | HP:0000545                       | 9/32                     |
| Ptosis                                                                                                       | HP:0000508                       | 10/36                    |
| Cataract                                                                                                     | HP:0000518                       | 8/33                     |
| Premature graying of hair                                                                                    | HP:0002216                       | 9/38                     |
| Dolichocephaly                                                                                               | HP:0000268                       | 9/39                     |
| Seizures                                                                                                     | HP:0001250                       | 23.00%                   |
| Fifth finger clinodactyly                                                                                    | HP:0001158                       | 8/38                     |
| Supra-auricular sinuses                                                                                      | HP:0008606                       | 15.00%                   |
| Hearing loss, sensorineural                                                                                  | HP:0000407                       | occasional               |
| Renal agenesis                                                                                               | HP:0000104                       | occasional               |
| Preaxial polydactyly                                                                                         | HP:0001177                       | occasional               |
| Lower lip pits                                                                                               | HP:0000196                       | occasional               |
| Agenesis of cerebellar vermis                                                                                | HP:0002335                       | occasional               |
| White forelock                                                                                               | HP:0002211                       | occasional               |
| Microtia                                                                                                     | HP:0000393                       | occasional               |
| Abnormality of the scalp                                                                                     | HP:0001965                       | occasional               |
| Broad nasal tip                                                                                              | HP:0000455                       | occasional               |
| Cleft palate                                                                                                 | HP:0000175                       | occasional               |
| Microcephaly                                                                                                 | HP:0000252                       | occasional               |
| Gastroesophageal obstruction <i>and/or</i> duplication of internal organs <i>and/or</i> malrotation of colon | HP:0002020                       | <i>and/or</i> occasional |
|                                                                                                              | HP:0005217                       | <i>and/or</i>            |
|                                                                                                              | HP:0004785                       |                          |
| Pyloric stenosis                                                                                             | HP:0002021                       | occasional               |
| Posterior auricular pit                                                                                      | HP:0004464                       | occasional               |

Inheritance: Autosomal dominant

Table S6: **Branchiooculofacial syndrome** [MIM 113620]. Feature frequencies according to [3] and [7].

| HPO Term                                                                 | Term ID                             | Frequency  |
|--------------------------------------------------------------------------|-------------------------------------|------------|
| Hearing loss                                                             | HP:0000365                          | 90.0%      |
| Preauricular pit                                                         | HP:0000392                          | 80.0%      |
| Renal dysplasia                                                          | HP:0000110                          | 65.0%      |
| Branchial fistula <i>or</i> Branchial cyst                               | HP:0009795 <i>or</i> HP:0009796     | 50.0%      |
| Cup-shaped ears                                                          | HP:0000378                          | 45.00%     |
| Abnormal form of ears                                                    | HP:0000377                          | 35.0%      |
| External auditory canal stenosis                                         | HP:0000402                          | 30.0%      |
| Abnormality of the middle ear <i>and/or</i> Abnormality of the inner ear | HP:0000370 <i>and/or</i> HP:0000359 | main       |
| Lacrimal duct aplasia <i>or</i> stenosis                                 | HP:00007993                         | 10.0%      |
| Long narrow facies                                                       | HP:0000318                          | occasional |
| Microdontia                                                              | HP:0000691                          | occasional |
| Euthyroid goiter                                                         | HP:0009798                          | occasional |
| Preauricular skin tag                                                    | HP:0000384                          | occasional |
| Cleft palate                                                             | HP:0000175                          | occasional |
| High-arched palate                                                       | HP:0000156                          | occasional |
| Lacrimation abnormality                                                  | HP:0000632                          | occasional |
| Bifid uvula                                                              | HP:0000193                          | occasional |
| abnormality of the cerebrum                                              | HP:0002060                          | occasional |
| Cranial nerve VII palsy                                                  | HP:0007212                          | occasional |
| Cholesteatoma                                                            | HP:0009797                          | occasional |
| Intestinal malrotation                                                   | HP:0002026                          | occasional |
| Congenital hip dislocation                                               | HP:0001374                          | occasional |

Inheritance: Autosomal dominant

Table S7: **Branchiootorenal syndrome 1** [MIM 113650]. Note that Branchiootorenal syndrome 1 is also known as Melnick-Fraser syndrome. Feature frequencies according to [3].



| HPO Term                                   | Term ID    | Frequency |
|--------------------------------------------|------------|-----------|
| Cortical thickening of long bone diaphyses | HP:0005791 | 82/87     |
| Asthenic habitus                           | HP:0001533 | hallmark  |
| Increased bone mineral density             | HP:0004350 | 26/29     |
| Limb pain                                  | HP:0009763 | 63/92     |
| Sclerotic skull base                       | HP:0002694 | 32/59     |
| Poor appetite                              | HP:0004396 | typical   |
| Amyotrophy                                 | HP:0003202 | typical   |
| Easy fatigability                          | HP:0003388 | 32/72     |
| Headaches                                  | HP:0002315 | 9/22      |
| Muscle weakness                            | HP:0001324 | 36/92     |
| Decreased subcutaneous fat                 | HP:0001002 | 10/47     |
| Delayed puberty                            | HP:0000823 | 1/6       |
| Deafness                                   | HP:0000404 | 10/67     |

Inheritance: Autosomal dominant

Table S8: **Camurati-Engelmann disease** [MIM 131300]. Feature frequencies according to [8].

| HPO Term                            | Term ID     | Frequency  |
|-------------------------------------|-------------|------------|
| Accessory index finger phalanges    | HP:0004107  | 100.00%    |
| Cleft palate                        | HP:0000175  | 78.00%     |
| Postnatal growth retardation        | HP:0001514  | 75.00%     |
| Micrognathia                        | HP:0000210  | 72.00%     |
| Bilateral single palmar creases     | HP:0007598  | 40.00%     |
| Coarctation of aorta                | HP:001680   | 39.00%     |
| Fifth finger clinodactyly           | HP:0001158  | 39.00%     |
| Ventricular septal defect           | HP:0001629  | 39.00%     |
| overriding aorta                    | HP:00002623 | 39.00%     |
| Dextrocardia                        | HP:0001651  | 39.00%     |
| Abnormal form of ears               | HP:0000377  | 33.00%     |
| Joint dislocations                  | HP:0002722  | occasional |
| Umbilical hernia                    | HP:0001537  | occasional |
| Developmental delay                 | HP:0000754  | occasional |
| Abnormality of the vertebral column | HP:0000925  | occasional |
| Short neck                          | HP:0000470  | occasional |
| Joint laxity                        | HP:0001388  | occasional |
| Prenatal growth deficiency          | HP:0001515  | occasional |
| Cleft lip                           | HP:0000204  | occasional |
| Pectus excavatum/carinatum          | HP:0006708  | occasional |
| Talipes equinovarus                 | HP:0001762  | occasional |
| Inguinal hernia                     | HP:0000023  | occasional |
| Seizures                            | HP:0001250  | occasional |
| Camptodactyly                       | HP:0001160  | occasional |
| Abnormality of the ribs             | HP:0000772  | occasional |
| Facial palsy                        | HP:0002517  | occasional |
| Cryptorchidism                      | HP:0000028  | occasional |

Inheritance: X-linked recessive and isolated cases

Table S9: **Catel-Manzke Syndrome 1** [MIM 302380]. Feature frequencies according to [3].

| HPO Term                                                                      | Term ID                                   | Frequency                |
|-------------------------------------------------------------------------------|-------------------------------------------|--------------------------|
| Mental retardation                                                            | HP:0001249                                | 100.00%                  |
| Small ears <i>and/or</i> Cup-shaped ears <i>and/or</i> Lop ears <i>and/or</i> | HP:0000409                                | <i>and/or</i> 90.00%     |
| Sensorineural deafness <i>and/or</i> Mixed hearing loss                       | HP:0000378                                | <i>and/or</i>            |
|                                                                               | HP:0000394                                | <i>and/or</i>            |
|                                                                               | HP:0000374                                | <i>and/or</i>            |
|                                                                               | HP:0000410                                |                          |
| Clinical anophthalmia <i>or</i> Iris coloboma <i>or</i> Retinal coloboma      | HP:0001485 <i>or</i> HP:0000612 <i>or</i> | 85.00%                   |
|                                                                               | HP:0000480                                |                          |
| Tetralogy of Fallot <i>and/or</i> Patent ductus arteriosus <i>and/or</i>      | HP:0001636                                | 77.50%                   |
| Double outlet right ventricle <i>and/or</i> Ventricular septal defect         |                                           |                          |
| <i>and/or</i> Atrial septal defect <i>and/or</i> Right aortic arch            |                                           |                          |
| Male: Hypoplastic male genitalia                                              | HP:0008721                                | 75.00%                   |
| Postnatal growth retardation                                                  | HP:0001514                                | 70.00%                   |
| Choanal atresia                                                               | HP:0000453                                | 58.00%                   |
| Arrhinencephaly                                                               | HP:0002139                                | main                     |
| Hypogonadotropic hypogonadism                                                 | HP:0000044                                | main                     |
| Scoliosis                                                                     | HP:0002650                                | occasional               |
| Abnormality of the nipples                                                    | HP:0004404                                | occasional               |
| Growth hormone deficiency                                                     | HP:0000824                                | occasional               |
| Sloping shoulders                                                             | HP:0001556                                | occasional               |
| Ptosis                                                                        | HP:0000508                                | occasional               |
| Polydactyly <i>and/or</i> Ectrodactyly <i>and/or</i> Hypoplastic thumb        | HP:0001161                                | <i>and/or</i> occasional |
| <i>and/or</i> Abnormal palmar dermatoglyphics                                 | HP:0001171                                | <i>and/or</i>            |
|                                                                               | HP:0009628                                | <i>and/or</i>            |
|                                                                               | HP:0001018                                |                          |
| Micrognathia                                                                  | HP:0000210                                | occasional               |
| Cranial nerve abnormality                                                     | HP:0001291                                | occasional               |
| Anal atresia <i>or</i> Anal stenosis                                          | HP:0002023 <i>or</i> HP:0002025           | occasional               |
| Abnormality of the ribs                                                       | HP:0000772                                | occasional               |
| Hemivertebrae                                                                 | HP:0002937                                | occasional               |
| Feeding difficulties                                                          | HP:0002022                                | occasional               |
| Hypertelorism                                                                 | HP:0000316                                | occasional               |
| Renal hypoplasia <i>or</i> Renal agenesis                                     | HP:0000089 <i>or</i> HP:0000104           | occasional               |
| Omphalocele                                                                   | HP:0001539                                | occasional               |
| Webbed neck                                                                   | HP:0000465                                | occasional               |
| Cleft palate                                                                  | HP:0000175                                | occasional               |
| Cleft lip                                                                     | HP:0000204                                | occasional               |
| Microcephaly                                                                  | HP:0000252                                | occasional               |
| Tracheoesophageal fistula                                                     | HP:0002575                                | occasional               |

Inheritance: Autosomal dominant, isolated cases

Table S10: **CHARGE Syndrome** [MIM 214800]. Feature frequencies according to [3].

| HPO Term                                                | Term ID                          | Frequency |
|---------------------------------------------------------|----------------------------------|-----------|
| Mental retardation                                      | HP:0001249                       | 30/30     |
| Broad hands <i>and</i> Tapered fingers                  | HP:0001169 <i>and</i> HP:0001182 | 30/30     |
| Broad nose <i>and</i> Thick nasal septum                | HP:0000445 <i>and</i> HP:0009746 | 25/25     |
| Hypertelorism <i>and</i> Telecanthus                    | HP:0000316 <i>and</i> HP:0000506 | 29/29     |
| Heavy arched eyebrows <i>and</i> Coarse facial features | HP:0007804 <i>and</i> HP:0000280 | 27/27     |
| Short stature                                           | HP:0001509                       | 29/30     |
| Thick, everted lower lip                                | HP:0009086                       | 27/28     |
| Drumstick' terminal phalanges                           | HP:0006129                       | 24/25     |
| Transverse palmar creases                               | HP:0000954                       | 16/17     |
| Downward slanting palpebral fissures                    | HP:0000494                       | 23/27     |
| Hypodontia                                              | HP:0000688                       | 16/19     |
| Pectus excavatum <i>or</i> Pectus carinatum             | HP:0000767 <i>or</i> HP:0000768  | 20/25     |
| Delayed skeletal maturation                             | HP:0002750                       | 15/19     |
| Kyphoscoliosis                                          | HP:0002751                       | 21/28     |
| Thickened calvarium                                     | HP:0002684                       | 14/22     |
| Seizures                                                | HP:0001250                       | 8/17      |

Inheritance: X-linked dominant

Table S11: **Coffin-Lowry Syndrome** [MIM 303600]. Feature frequencies according to [9].

| HPO Term                                                                                                                  | Term ID                                                                   | Frequency |
|---------------------------------------------------------------------------------------------------------------------------|---------------------------------------------------------------------------|-----------|
| Hypoplastic to absent fifth finger- and toenails                                                                          | HP:0008398                                                                | 33/33     |
| Pervasive developmental disorder                                                                                          | HP:0000729                                                                | 31/31     |
| Full lips                                                                                                                 | HP:0000170                                                                | 28/32     |
| Coarse facial features                                                                                                    | HP:0000280                                                                | 27/31     |
| Feeding difficulties                                                                                                      | HP:0002022                                                                | 25/29     |
| Wide mouth                                                                                                                | HP:0000154                                                                | 23/27     |
| Lumbosacral hirsutism                                                                                                     | HP:0009747                                                                | 25/30     |
| Flattened nasal bridge <i>and</i> broad nasal tip                                                                         | HP:0000425 <i>and</i> HP:0000455                                          | 24/29     |
| Sparse scalp hair                                                                                                         | HP:0002209                                                                | 23/28     |
| Thick eyebrows                                                                                                            | HP:0000574                                                                | 23/30     |
| Postnatal growth retardation                                                                                              | HP:0001514                                                                | 14/19     |
| Delayed skeletal maturation                                                                                               | HP:0002750                                                                | 11/15     |
| Microcephaly                                                                                                              | HP:0000252                                                                | 21/30     |
| Recurrent upper and lower respiratory tract infections                                                                    | HP:0002873                                                                | 14/22     |
| Intrauterine growth retardation                                                                                           | HP:0001511                                                                | typical   |
| Delayed dentition                                                                                                         | HP:0000684                                                                | typical   |
| Hypoplastic corpus callosum <i>and/or</i> Dandy-Walker malformation                                                       | HP:0002079 <i>and/or</i> HP:0001305                                       | typical   |
| Short stature                                                                                                             | HP:0001509                                                                | typical   |
| Patent ductus arteriosus <i>or</i> Tetralogy of Fallot <i>or</i> Ventricular septum defect <i>or</i> Atrial septal defect | HP:0001643 <i>or</i> HP:0001636 <i>or</i> HP:0001629 <i>or</i> HP:0001631 | 9/22      |
| Scoliosis                                                                                                                 | HP:0002650                                                                | 6/17      |

Inheritance: Autosomal recessive

Table S12: **Coffin-Siris Syndrome [MIM 135900]**. Feature frequencies according to [10].

| HPO Term                                    | Term ID    | Frequency |
|---------------------------------------------|------------|-----------|
| Mental retardation                          | HP:0001249 | 100.00%   |
| Pes planus                                  | HP:0001763 | 97.00%    |
| Microcephaly                                | HP:0000252 | 28/31     |
| Feeding difficulties                        | HP:0002022 | 27/33     |
| Leukopenia                                  | HP:0001182 | 78.00%    |
| Short stature                               | HP:0001509 | 21/33     |
| Neonatal hypotonia                          | HP:0001319 | 56.00%    |
| Myopia                                      | HP:0000545 | typical   |
| Delayed motor milestones                    | HP:0002130 | typical   |
| Prominent nasal bridge                      | HP:0000426 | typical   |
| Truncal obesity developing in mid-childhood | HP:0008874 | typical   |
| Beaked nose                                 | HP:0000444 | typical   |
| Short philtrum                              | HP:0000322 | typical   |
| Chorioretinal dystrophy                     | HP:0001135 | typical   |
| Thick eyebrows                              | HP:0000574 | typical   |
| Narrow hand                                 | HP:0004283 | typical   |
| Prominent upper central incisors            | HP:0000675 | typical   |
| Downward slanting palpebral fissures        | HP:0000494 | typical   |
| Delayed puberty                             | HP:0000823 | 40.00%    |
| Impaired vision                             | HP:0000505 | 35.00%    |
| Hyperextensible joints                      | HP:0001378 | frequent  |
| Laryngomalacia                              | HP:0001601 | frequent  |
| Low birth weight                            | HP:0001518 | frequent  |
| Mild thoracic scoliosis                     | HP:0004615 | 31.00%    |
| Mild lumbar lordosis                        | HP:0004560 | 31.00%    |

Inheritance: Autosomal recessive

Table S13: **Cohen Syndrome** [MIM 216550]. Feature frequencies according to [11].

| HPO Term                                                                                                | Term ID                                              | Frequency                                       |
|---------------------------------------------------------------------------------------------------------|------------------------------------------------------|-------------------------------------------------|
| Marfanoid habitus <i>and</i> arachnodactyly                                                             | HPO:0001519<br>HPO:0001166                           | <i>and</i> 86.00%                               |
| Elbow contractures                                                                                      | HP:0002987                                           | 86.00%                                          |
| Knee contractures                                                                                       | HP:0002978                                           | 81.00%                                          |
| Camptodactyly                                                                                           | HP:0001160                                           | 78.00%                                          |
| Poorly defined conchae                                                                                  | HP:0008602                                           | 75.00%                                          |
| Hypoplastic calf muscles                                                                                | HP:0008962                                           | 65.00%                                          |
| Kyphoscoliosis                                                                                          | HP:0002751                                           | 46.00%                                          |
| Talipes equinovarus                                                                                     | HP:0001762                                           | 32.00%                                          |
| Frontal bossing                                                                                         | HP:0000254                                           | 29.00%                                          |
| Scaphocephaly <i>and/or</i> Brachycephaly <i>and/or</i> Dolichocephaly<br><i>and/or</i> frontal bossing | HP:0000258<br>HP:0000248<br>HP:0000268<br>HP:0000254 | <i>and/or</i><br><i>and/or</i><br><i>and/or</i> |
| Micrognathia                                                                                            | HP:0000210                                           | 26.00%                                          |
| Hip contractures                                                                                        | HP:0003273                                           | 26.00%                                          |
| Ulnar deviation of fingers                                                                              | HP:0001120                                           | main                                            |
| Relatively short neck                                                                                   | HP:0005992                                           | main                                            |
| Mitral valve regurgitation                                                                              | HP:0001653                                           | main                                            |
| Metatarsus varus                                                                                        | HP:0001840                                           | main                                            |
| Myopia                                                                                                  | HP:0000545                                           | occasional                                      |
| Aortic root dilatation                                                                                  | HP:0002616                                           | occasional                                      |
| Atrial septal defect                                                                                    | HP:0001631                                           | occasional                                      |
| Pectus excavatum/carinatum                                                                              | HP:0006708                                           | occasional                                      |
| Iris coloboma                                                                                           | HP:0000612                                           | occasional                                      |
| Mitral valve prolapse                                                                                   | HP:0001634                                           | occasional                                      |
| Keratoconus                                                                                             | HP:0000563                                           | occasional                                      |
| Ventricular septal defect                                                                               | HP:0001629                                           | occasional                                      |
| Dislocation of patella                                                                                  | HP:0002999                                           | occasional                                      |

Inheritance: Autosomal dominant

Table S14: **Congenital Contractural Arachnodactyly (CCA; Beals Hecht Syndrome [MIM 121050]**. Feature frequencies according to [3].

| HPO Term                                                                                             | Term ID                                                | Frequency  |
|------------------------------------------------------------------------------------------------------|--------------------------------------------------------|------------|
| Hypertonicity                                                                                        | HP:0002388                                             | 100.00%    |
| Delayed skeletal maturation                                                                          | HP:0002750                                             | 100.00%    |
| Long, curly eyelashes                                                                                | HP:0000500                                             | 99.00%     |
| Broad bushy eyebrows <i>and</i> Synophrys                                                            | HP:0004546 <i>and</i> HP:0000664                       | 98.00%     |
| Long philtrum <i>and</i> Thin upper lip <i>and</i> Downturned corners of mouth                       | HP:0000343 <i>and</i> HP:0000219 <i>and</i> HP:0002714 | 94.00%     |
| Microbrachycephaly                                                                                   | HP:0002258                                             | 93.00%     |
| Micromelia                                                                                           | HP:0002983                                             | 93.00%     |
| Low posterior hairline                                                                               | HP:0002162                                             | 92.00%     |
| Late eruption of teeth                                                                               | HP:0006328                                             | 86.00%     |
| 3-4 toe syndactyly                                                                                   | HP:0004691                                             | 86.00%     |
| High-arched palate                                                                                   | HP:0000156                                             | 86.00%     |
| Anteverted nostrils                                                                                  | HP:0000463                                             | 85.00%     |
| Micrognathia                                                                                         | HP:0000210                                             | 84.00%     |
| Flattened nasal bridge                                                                               | HP:0000425                                             | 83.00%     |
| Hirsutism                                                                                            | HP:0001007                                             | 78.00%     |
| Fifth finger clinodactyly                                                                            | HP:0001158                                             | 74.00%     |
| Weak cry                                                                                             | HP:0001612                                             | 74.00%     |
| Undescended testes                                                                                   | HP:0000797                                             | 73.00%     |
| Proximally placed thumbs                                                                             | HP:0001170                                             | 72.00%     |
| Short neck                                                                                           | HP:0000470                                             | 66.00%     |
| Elbow contractures                                                                                   | HP:0002987                                             | 64.00%     |
| Hearing loss                                                                                         | HP:0000365                                             | 60.00%     |
| Male: Hypoplastic male genitalia                                                                     | HP:0008721                                             | 57.00%     |
| Myosis <i>or</i> ptosis <i>or</i> nystagmus                                                          | HP:0000545 <i>or</i> HP:0000508 <i>or</i> HP:0000639   | 57.00%     |
| Cutis marmorata                                                                                      | HP:0000965                                             | 56.00%     |
| Transverse palmar creases                                                                            | HP:0000954                                             | 51.00%     |
| abnormal umbilicus                                                                                   | HP:0001551                                             | 50.00%     |
| Hypoplastic nipples                                                                                  | HP:0002557                                             | 50.00%     |
| Hypospadias                                                                                          | HP:0000047                                             | 33.00%     |
| Gastrooesophageal reflux                                                                             | HP:0002020                                             | 30.00%     |
| Phocomelia <i>and</i> Oligodactyly                                                                   | HP:0002994 <i>and</i> HP:0001180                       | 27.00%     |
| Mental retardation                                                                                   | HP:0001249                                             | main       |
| Short sternum <i>and</i> Supernumerary ribs                                                          | HP:0000879 <i>and</i> HP:0005815                       | main       |
| Dislocated radial head <i>or</i> Hypoplastic radial head                                             | HP:0003083 <i>or</i> HP:0003997                        | main       |
| Prenatal growth deficiency                                                                           | HP:0001515                                             | main       |
| Seizures                                                                                             | HP:0001250                                             | 23.00%     |
| Optic nerve coloboma                                                                                 | HP:0000588                                             | occasional |
| Astigmatism                                                                                          | HP:0000483                                             | occasional |
| Optic atrophy                                                                                        | HP:0000648                                             | occasional |
| Cardiac malformation <i>or</i> Ventricular septal defect                                             | HP:0002564 <i>or</i> HP:0001629                        | occasional |
| Hypoplastic radius                                                                                   | HP:0002984                                             | occasional |
| Strabismus                                                                                           | HP:0000486                                             | occasional |
| Proptosis                                                                                            | HP:0000520                                             | occasional |
| Thrombocytopenia                                                                                     | HP:0001873                                             | occasional |
| Low set ears                                                                                         | HP:0000369                                             | occasional |
| Hypoplastic labia majora                                                                             | HP:0000059                                             | occasional |
| Hiatus hernia                                                                                        | HP:0002036                                             | occasional |
| Diaphragmatic hernia                                                                                 | HP:0000776                                             | occasional |
| Cleft palate                                                                                         | HP:0000175                                             | occasional |
| Microcornea                                                                                          | HP:0000482                                             | occasional |
| Abnormality of the esophagus                                                                         | HP:0002031                                             | occasional |
| Pyloric stenosis                                                                                     | HP:0002021                                             | occasional |
| Choanal atresia                                                                                      | HP:0000453                                             | occasional |
| Inguinal hernia                                                                                      | HP:0000023                                             | occasional |
| Gastroesophageal obstruction <i>or</i> Duplication of internal organs <i>or</i> Malrotation of colon | HP:0002020 <i>or</i> HP:0005217 <i>or</i> HP:0004785   | occasional |

Inheritance: Autosomal dominant and isolated cases

Table S15: **Cornelia de Lange Syndrome 1** [MIM 122470]. Feature frequencies according to [3].



| HPO Term                           | Term ID    | Frequency  |
|------------------------------------|------------|------------|
| Hemisacrum (S2-S5)                 | HP:0009790 | 75.00%     |
| Anterior sacral meningocele        | HP:0007293 | 102/205    |
| Chronic constipation               | HP:0002241 | 84/205     |
| Rectovaginal fistula               | HP:0000143 | frequent   |
| Presacral teratoma                 | HP:0009793 | frequent   |
| Recurrent urinary tract infections | HP:0000010 | frequent   |
| Bifid sacrum                       | HP:0009791 | 22.00%     |
| Gastrointestinal obstruction       | HP:0004796 | 33/205     |
| Tethered cord                      | HP:0002144 | 29/205     |
| Meningitis                         | HP:0001287 | 23/205     |
| Perianal abscess                   | HP:0009789 | 23/205     |
| Vesicoureteral reflux              | HP:0000076 | occasional |
| Bicornuate uterus                  | HP:0000813 | occasional |

Inheritance: Autosomal dominant

Table S16: **Currarino syndrome** [MIM 176450]. Feature frequencies according to [12] and [13].

| HPO Term                                     | Term ID    | Frequency  |
|----------------------------------------------|------------|------------|
| Distichiasis                                 | HP:0009743 | 100.00%    |
| Lymphedema, predominantly in the lower limbs | HP:0003550 | 66.00%     |
| Abnormalities of the vertebrae               | HP:0003468 | 62.00%     |
| Epidural arachnoid cysts of the spinal canal | HP:0009745 | 46.00%     |
| Cardiac malformation                         | HP:0002564 | 38.00%     |
| Kyphosis                                     | HP:0002808 | occasional |
| Scoliosis                                    | HP:0002650 | occasional |
| Microphthalmos                               | HP:0000568 | occasional |
| Ptosis                                       | HP:0000508 | occasional |
| Micrognathia                                 | HP:0000210 | occasional |
| Strabismus                                   | HP:0000486 | occasional |
| Ectropion                                    | HP:0000656 | occasional |
| Bifid uterus                                 | HP:0000136 | occasional |
| Cleft palate                                 | HP:0000175 | occasional |
| Webbed neck                                  | HP:0000465 | occasional |
| Epicanthal folds                             | HP:0000286 | occasional |
| Bifid uvula                                  | HP:0000193 | occasional |
| Cryptorchidism                               | HP:0000028 | occasional |
| Short stature                                | HP:0001509 | occasional |
| Cleft lip                                    | HP:0000204 | 4.00%      |

Inheritance: autosomal dominant

Table S17: **Distichiasis Lymphedema Syndrome [MIM 153400]**. Feature frequencies according to [3].

| HPO Term                                                                                | Term ID                                              | Frequency  |
|-----------------------------------------------------------------------------------------|------------------------------------------------------|------------|
| Vertical talus                                                                          | HP:0001838                                           | 88.00%     |
| Congenital hip dislocation <i>or</i> Decreased hip abduction <i>or</i> Hip contractures | HP:0001374 <i>or</i> HP:0003184 <i>or</i> HP:0003273 | 38.00%     |
| Calcaneovalgus deformities                                                              | HP:0001848                                           | 33.00%     |
| knee contractures                                                                       | HP:0002978                                           | 30.00%     |
| Ulnar deviation of the hand <i>or</i> of fingers of the hand <i>and</i> Camptodactyly   | HP:0001193 <i>and</i> HP:0001160                     | main       |
| Clenched hands                                                                          | HP:0001188                                           | main       |
| Talipes equinovarus                                                                     | HP:0001762                                           | 25.00%     |
| Adducted thumbs                                                                         | HP:0001181                                           | main       |
| Absent distal interphalangeal creases                                                   | HP:0001032                                           | main       |
| Stiff shoulders                                                                         | HP:0009742                                           | 17.00%     |
| Transverse palmar creases                                                               | HP:0000954                                           | occasional |
| Mild scoliosis                                                                          | HP:0003303                                           | occasional |
| Trismus                                                                                 | HP:0000211                                           | occasional |
| Cryptorchidism                                                                          | HP:0000028                                           | occasional |

Inheritance: Autosomal dominant

Table S18: **Distal Arthrogyposis Syndrome Type 1** [MIM 108120]. Feature frequencies according to [3].

| HPO Term                                                                                                                                                                             | Term ID                                                                                                                                                                        | Frequency  |
|--------------------------------------------------------------------------------------------------------------------------------------------------------------------------------------|--------------------------------------------------------------------------------------------------------------------------------------------------------------------------------|------------|
| Ectrodactyly <i>and</i> Ectrodactyly (feet) <i>and</i> Syndactyly                                                                                                                    | HP:0001171 <i>and</i> HP:0001839<br><i>and</i> HP:0001159                                                                                                                      | 84.00%     |
| Cleft lip                                                                                                                                                                            | HP:0000204                                                                                                                                                                     | 68.00%     |
| Lacrimal duct abnormalities                                                                                                                                                          | HP:0000614                                                                                                                                                                     | 59.00%     |
| Renal agenesis <i>and/or</i> Renal aplasia <i>and/or</i> Hydroureter<br><i>and/or</i> bladder diverticula <i>and/or</i> Duplicated collecting system<br><i>and/or</i> Hydronephrosis | HP:0000119 <i>and/or</i><br>HP:0000104 <i>and/or</i><br>HP:0000110 <i>and/or</i><br>HP:0000072 <i>and/or</i><br>HP:0000015 <i>and/or</i> HP:000081<br><i>and/or</i> HP:0000126 | 52.00%     |
| Blepharitis                                                                                                                                                                          | HP:0000498                                                                                                                                                                     | main       |
| Photophobia                                                                                                                                                                          | HP:0000613                                                                                                                                                                     | main       |
| Malar hypoplasia                                                                                                                                                                     | HP:0000272                                                                                                                                                                     | main       |
| Microdontia                                                                                                                                                                          | HP:0000691                                                                                                                                                                     | main       |
| Dacryocystitis                                                                                                                                                                       | HP:0000620                                                                                                                                                                     | main       |
| Cariou teeth                                                                                                                                                                         | HP:0000670                                                                                                                                                                     | main       |
| Fair skin <i>and</i> Thin skin                                                                                                                                                       | HP:0000984 <i>and</i> HP:0000963                                                                                                                                               | main       |
| Hypoplastic nipples                                                                                                                                                                  | HP:0002557                                                                                                                                                                     | main       |
| Maxillary hypoplasia                                                                                                                                                                 | HP:0000327                                                                                                                                                                     | main       |
| Fine, sparse, light colored hair                                                                                                                                                     | HP:0004538                                                                                                                                                                     | main       |
| Blepharophimosis                                                                                                                                                                     | HP:0000581                                                                                                                                                                     | main       |
| Partial anodontia                                                                                                                                                                    | HP:0000702                                                                                                                                                                     | main       |
| Blue irides                                                                                                                                                                          | HP:0000635                                                                                                                                                                     | main       |
| Mild hyperkeratosis                                                                                                                                                                  | HP:0007523                                                                                                                                                                     | main       |
| Nail dysplasia                                                                                                                                                                       | HP:0002164                                                                                                                                                                     | main       |
| Hearing loss, conductive                                                                                                                                                             | HP:0000405                                                                                                                                                                     | 14.00%     |
| Central diabetes insipidus                                                                                                                                                           | HP:0000863                                                                                                                                                                     | occasional |
| Clinodactyly                                                                                                                                                                         | HP:0001157                                                                                                                                                                     | occasional |
| Growth hormone deficiency                                                                                                                                                            | HP:0000824                                                                                                                                                                     | occasional |
| Telecanthus <i>and</i> Hypertelorism                                                                                                                                                 | HP:0000506 <i>and</i> HP:0000316                                                                                                                                               | occasional |
| Abnormal form of ears <i>or</i> Small ears                                                                                                                                           | HP:0000377 <i>or</i> HP:0000409                                                                                                                                                | occasional |
| Female: Anal atresia <i>and</i> Rectovaginal fistula                                                                                                                                 | HP:0002023 <i>and</i> HP:0000143                                                                                                                                               | occasional |
| Polydactyly                                                                                                                                                                          | HP:0001161                                                                                                                                                                     | occasional |
| Hypogonadotropic hypogonadism                                                                                                                                                        | HP:0000044                                                                                                                                                                     | occasional |
| Broad nasal tip                                                                                                                                                                      | HP:0000455                                                                                                                                                                     | occasional |
| Microcephaly                                                                                                                                                                         | HP:0000252                                                                                                                                                                     | occasional |
| Semilobar holoprosencephaly                                                                                                                                                          | HP:0002507                                                                                                                                                                     | occasional |
| Choanal atresia                                                                                                                                                                      | HP:0000453                                                                                                                                                                     | occasional |
| Inguinal hernia                                                                                                                                                                      | HP:0000023                                                                                                                                                                     | occasional |
| Mental retardation                                                                                                                                                                   | HP:0001249                                                                                                                                                                     | 7.00%      |
| Recurrent respiratory infections                                                                                                                                                     | HP:0002205                                                                                                                                                                     | 6.00%      |

Inheritance: autosomal dominant with variable expression

Table S19: **Ectrodactyly, ectodermal dysplasia, and cleft lip/palate syndrome (EEC1) [MIM 129900]**. Feature frequencies according to [3]. Note that EEC3 is clinically identical and also has a separate OMIM entry [MIM 604292].

| HPO Term                                 | Term ID    | Frequency |
|------------------------------------------|------------|-----------|
| Hypertelorism                            | HP:0000316 | 89/100    |
| Mild to moderate short stature           | HP:0003503 | 86/98     |
| Wide philtrum                            | HP:0000289 | 88/104    |
| Fleshy earlobes                          | HP:0009748 | 85/103    |
| Short broad hands                        | HP:0001174 | 63/77     |
| Brachydactyly                            | HP:0001156 | 63/77     |
| Curved linear dimple below the lower lip | HP:0002055 | 80/99     |
| Maxillary hypoplasia                     | HP:0000327 | 84/104    |
| Anteverted nostrils                      | HP:0000463 | 42/53     |
| Shawl scrotum                            | HP:0000049 | 74/96     |
| Widow's peak                             | HP:0000349 | 52/68     |
| Finger joint hyperextensibility          | HP:0006158 | 46/61     |
| Clinodactyly                             | HP:0001157 | 57/82     |
| Transverse palmar creases                | HP:0000954 | 38/55     |
| Small, short nose                        | HP:0003192 | 42/62     |
| Broad nasal bridge                       | HP:0000431 | 50/75     |
| Prominent umbilicus                      | HP:0001544 | 16/24     |
| Cryptorchidism                           | HP:0000028 | 60/94     |
| Inguinal hernia                          | HP:0000023 | 58/94     |
| Mild syndactyly                          | HP:0001236 | 45/73     |
| Downward slanting palpebral fissures     | HP:0000494 | 43/81     |
| Ptosis                                   | HP:0000508 | 41/81     |
| Short broad feet                         | HP:0001778 | typical   |
| Pectus excavatum                         | HP:0000767 | 34/74     |

Inheritance: X-linked recessive

Table S20: **Facio-genital dysplasia (Aarskog-Scott Syndrome) [MIM 305400]**. Feature frequencies according to [14].

| HPO Term                                                                  | Term ID                          | Frequency  |
|---------------------------------------------------------------------------|----------------------------------|------------|
| Cryptophthalmos                                                           | HP:0001126                       | 93.00%     |
| partial cutaneous syndactyly                                              | HP:0006054                       | 57.00%     |
| mental deficiency                                                         | HP:0001267                       | 50.00%     |
| Cup-shaped ears <i>or</i> External auditory canal atresia                 | HP:0000378 <i>or</i> HP:0000413  | 44.00%     |
| Renal hypoplasia <i>or</i> Renal agenesis                                 | HP:0000089 <i>or</i> HP:0000104  | 37.00%     |
| Unusual hairline with hair growth on temples extending to lateral eyebrow | HP:0005352                       | 34.00%     |
| Hypoplastic notched nares                                                 | HP:0005286                       | main       |
| Vaginal atresia                                                           | HP:0000148                       | main       |
| Broad nose <i>and</i> Flattened nasal bridge                              | HP:0000445 <i>and</i> HP:0000425 | main       |
| Bicornuate uterus                                                         | HP:0000813                       | main       |
| Hypospadias                                                               | HP:0000047                       | main       |
| Clitoromegaly                                                             | HP:0000057                       | main       |
| Cryptorchidism                                                            | HP:0000028                       | main       |
| Laryngeal stenosis <i>or</i> Laryngeal atresia                            | HP:0005950 <i>or</i> HP:0008750  | 21.00%     |
| Skull defect                                                              | HP:0001362                       | 9.00%      |
| Hypoplastic/absent phalanges                                              | HP:0006056                       | occasional |
| Hypoplastic nostrils                                                      | HP:0004497                       | occasional |
| Abnormality of the anus                                                   | HP:0004378                       | occasional |
| Middle ear malformation                                                   | HP:0008609                       | occasional |
| Cardiac abnormality                                                       | HP:0001627                       | occasional |
| Wide pubic symphysis                                                      | HP:0003183                       | occasional |
| Anophthalmia                                                              | HP:0000528                       | occasional |
| Abnormal gyration                                                         | HP:0002536                       | occasional |
| Pulmonary hypoplasia                                                      | HP:0002089                       | occasional |
| Midline nasal groove                                                      | HP:0004112                       | occasional |
| Upper eyelid coloboma                                                     | HP:0000636                       | occasional |
| Abnormality of the thymus                                                 | HP:0000777                       | occasional |
| Microtia                                                                  | HP:0000393                       | occasional |
| Absent eyebrows and eyelashes                                             | HP:0002288                       | occasional |
| Absent or hypoplastic thumbs                                              | HP:0002950                       | occasional |
| Subglottic stenosis                                                       | HP:0001607                       | occasional |
| Abnormality of the urinary tract                                          | HP:0000079                       | occasional |
| Abnormal umbilicus                                                        | HP:0001551                       | occasional |
| Wide intermamillary distance                                              | HP:0006610                       | occasional |
| Microcephaly                                                              | HP:0000252                       | occasional |
| White corneal opacification                                               | HP:0007883                       | occasional |
| Aplasia/Hypoplasia of the sternum                                         | HP:0006714                       | occasional |
| Microphthalmia, bilateral                                                 | HP:0001585                       | occasional |
| meningomyelocele                                                          | HP:0002475                       | occasional |
| Low-set ears                                                              | HP:0000369                       | occasional |
| Hydrocephalus                                                             | HP:0000238                       | occasional |
| Facial cleft                                                              | HP:0002006                       | occasional |
| Abnormality of the small intestine                                        | HP:0002244                       | occasional |
| Dental malocclusion <i>and</i> Dental overcrowding                        | HP:0000689 <i>and</i> HP:0000678 | occasional |
| Hypoplastic superior helix                                                | HP:0008559                       | occasional |
| choanal stenosis                                                          | HP:0000452                       | occasional |
| Encephalocele                                                             | HP:0002084                       | occasional |
| Difficulty in tongue movement                                             | HP:0000183                       | 6.00%      |
| Cleft lip                                                                 | HP:0000204                       | 4.00%      |
| Cleft palate                                                              | HP:0000175                       | 3.00%      |

Inheritance: autosomal recessive

Table S21: **Fraser Syndrome** [MIM 219000]. Feature frequencies according to [3].

| HPO Term                                                  | Term ID                          | Frequency  |
|-----------------------------------------------------------|----------------------------------|------------|
| Whistling' appearance                                     | HP:0000346                       | 100.00%    |
| Ulnar deviation                                           | HP:0001193                       | 91.00%     |
| Contractures of fingers                                   | HP:0004094                       | 88.00%     |
| Kyphoscoliosis                                            | HP:0002751                       | 84.00%     |
| Hip contractures                                          | HP:0003273                       | 73.00%     |
| Knee contractures                                         | HP:0002978                       | 73.00%     |
| Postnatal growth retardation                              | HP:0001514                       | 62.00%     |
| Talipes Equinovarus <i>and</i> Toe contractures           | HP:0001762 <i>and</i> HP:0001860 | 59.00%     |
| Microcephaly                                              | HP:0000252                       | 44.00%     |
| Mental deficiency                                         | HP:0001267                       | 31.00%     |
| High palate                                               | HP:0000218                       | main       |
| Telecanthus                                               | HP:0000506                       | main       |
| Hypoplastic nose                                          | HP:0000440                       | main       |
| Deep set eyes                                             | HP:0000490                       | main       |
| Long philtrum                                             | HP:0000343                       | main       |
| Strabismus                                                | HP:0000486                       | main       |
| Small tongue                                              | HP:0000226                       | main       |
| Blepharophimosis                                          | HP:0000581                       | main       |
| Prominent chin with central dimple                        | HP:0004648                       | main       |
| Vertical talus                                            | HP:0001838                       | main       |
| Broad nasal bridge                                        | HP:0000431                       | main       |
| Undescended testes                                        | HP:0000797                       | main       |
| Hypoplastic nasal alae                                    | HP:0000430                       | main       |
| Shoulder contractures                                     | HP:0003044                       | main       |
| Adducted thumbs                                           | HP:0001181                       | main       |
| Epicanthal folds                                          | HP:0000286                       | main       |
| Inguinal hernia                                           | HP:0000023                       | main       |
| Nasal speech                                              | HP:0001611                       | main       |
| Seizures                                                  | HP:0001250                       | 19.00%     |
| Cerebellar atrophy <i>and</i> hypoplasia of the brainstem | HP:0001272 <i>and</i> HP:0002365 | occasional |
| Spina bifida occulta                                      | HP:0003298                       | occasional |
| Ptosis                                                    | HP:0000508                       | occasional |
| Short neck                                                | HP:0000470                       | occasional |
| Dislocated hips                                           | HP:0002827                       | occasional |
| Low birth weight                                          | HP:0001518                       | occasional |
| Abnormal brainstem auditory evoked potentials             | HP:0006923                       | occasional |

Inheritance: autosomal dominant

Table S22: **Freeman-Sheldon Syndrome** [MIM 193700]. Feature frequencies according to [15].

| HPO Term                               | Term ID    | Frequency  |
|----------------------------------------|------------|------------|
| Abnormality of the carpal bones        | HP:0001547 | typical    |
| Atrial septum defect                   | HP:0001631 | 34/82      |
| Hypoplastic radius                     | HP:0002984 | 31/82      |
| Ventricular septum defect              | HP:0001629 | 12/82      |
| Phocomelia                             | HP:0002994 | 9/82       |
| Pectus excavatum/carinatum             | HP:0006708 | Occasional |
| Patent ductus arteriosus               | HP:0001643 | Occasional |
| Thoracic scoliosis                     | HP:0002943 | Occasional |
| Aplasia of the pectoralis major muscle | HP:0009751 | Occasional |

Inheritance: Autosomal dominant

Table S23: **Holt-Oram Syndrome** [MIM 142900]. Feature frequencies according to [16].



| HPO Term                                                   | Term ID                                | Frequency |
|------------------------------------------------------------|----------------------------------------|-----------|
| Micrognathia                                               | HP:0000210                             | 100%      |
| Severe prenatal onset hydrocephalus                        | HP:0006882                             | 92%       |
| Polyhydramnios                                             | HP:0001561                             | 92%       |
| Microphthalmos                                             | HP:0000568                             | 86%       |
| Bifid nose                                                 | HP:0003190                             | 86%       |
| Postaxial polydactyly                                      | HP:0001162                             | 77%       |
| Cleft in skull base                                        | HP:0009752                             | 76%       |
| Stillbirth                                                 | HP:0001624                             | 73%       |
| Abnormal form of ears <i>and</i> low-set ears              | HP:0000377 <i>and</i> HP:0000369       | 70%       |
| Defective lung lobation                                    | HP:0009753                             | 66%       |
| Preaxial polydactyly (feet)                                | HP:0001841                             | 65%       |
| Tracheal stenosis <i>and</i> Hypoplastic larynx            | HP:0002777 <i>and</i> HP:0008749       | 57%       |
| Cleft palate <i>and/or</i> Cleft lip                       | HP:0000175 <i>and/or</i><br>HP:0000204 | 55%       |
| Talipes equinovarus                                        | HP:0001762                             | 52%       |
| Atrioventricular canal <i>or</i> Ventricular septal defect | HP:0001674 <i>or</i> HP:0001629        | 48%       |
| Duplicated halluces                                        | HP:0001784                             | 47%       |
| Male: Hypospadias                                          | HP:0000047                             | frequent  |
| Female: Bifid uterus                                       | HP:0000136                             | frequent  |
| Short arms                                                 | HP:0003056                             | 24%       |
| Hydronephrosis                                             | HP:0000126                             | 16%       |

Inheritance: Autosomal dominant

Table S24: **Hydrolethalus syndrome 1** [MIM 236680]. Feature frequencies according to [17].

| HPO Term                             | Term ID    | Frequency  |
|--------------------------------------|------------|------------|
| I-III toe syndactyly                 | HP:0001495 | 90.00%     |
| Broad halluces                       | HP:0001834 | 89.00%     |
| CHECK THIS                           | HP:0001159 | 82.00%     |
| Broad nasal root                     | HP:0000424 | 79.00%     |
| Postaxial polydactyly                | HP:0001162 | 78.00%     |
| High forehead                        | HP:0000348 | 70.00%     |
| Frontal bossing                      | HP:0000254 | 58.00%     |
| Macrocephaly                         | HP:0000256 | 52.00%     |
| Hypertelorism                        | HP:0000316 | main       |
| Mild mental deficiency               | HP:0001256 | occasional |
| Umbilical hernia                     | HP:0001537 | occasional |
| Cardiac abnormality                  | HP:0001627 | occasional |
| Downward slanting palpebral fissures | HP:0000494 | occasional |
| Preaxial polydactyly                 | HP:0006046 | occasional |
| Agenesis of corpus callosum          | HP:0001274 | occasional |
| Camptodactyly                        | HP:0001160 | occasional |
| Hyperglycemia                        | HP:0001943 | occasional |
| Abnormality of muscle fibers         | HP:0004303 | occasional |
| Syndactyly                           | HP:0001159 | occasional |
| Accelerated skeletal maturation      | HP:0005616 | occasional |
| Delayed closure of cranial sutures   | HP:0002704 | occasional |
| Postaxial polydactyly (feet)         | HP:0001830 | occasional |
| Hirsutism                            | HP:0001007 | occasional |
| Hydrocephalus                        | HP:0000238 | occasional |
| Inguinal hernia                      | HP:0000023 | occasional |
| Seizures                             | HP:0001250 | occasional |
| Craniosynostosis                     | HP:0001363 | occasional |
| Hypospadias                          | HP:0000047 | occasional |
| Cryptorchidism                       | HP:0000028 | occasional |

Inheritance: Autosomal dominant

Table S25: **Greig cephalopolysyndactyly syndrome [MIM 175700]**. Feature frequencies according to [3] and [18].

| HPO Term                                                                                       | Term ID                                                                            | Frequency  |
|------------------------------------------------------------------------------------------------|------------------------------------------------------------------------------------|------------|
| Pancreatic insufficiency <i>and</i> malabsorption                                              | HP:0002581 <i>and</i> HP:0002024                                                   | 100.00%    |
| Hypoplastic nasal alae                                                                         | HP:0000430                                                                         | 100.00%    |
| Sparse scalp hair <i>and</i> frontal hair upsweep                                              | HP:0002209 <i>and</i> HP:0002236                                                   | 96.00%     |
| Hypoplastic deciduous teeth                                                                    | HP:0006334                                                                         | 90.00%     |
| Absent permanent teeth                                                                         | HP:0006349                                                                         | 90.00%     |
| Scalp aplasia cutis congenita                                                                  | HP:0007568                                                                         | 87.00%     |
| Hypotonia                                                                                      | HP:0001318                                                                         | 80.00%     |
| Sensorineural deafness                                                                         | HP:0000374                                                                         | 75.00%     |
| Mental retardation                                                                             | HP:0001249                                                                         | 67.00%     |
| Prenatal growth deficiency                                                                     | HP:0001515                                                                         | 60.00%     |
| Mild microcephaly                                                                              | HP:0001366                                                                         | 50.00%     |
| Imperforate anus <i>or</i> anteriorly placed anus                                              | HP:0001550 <i>or</i> HP:0001545                                                    | 40.00%     |
| Hypothyroidism                                                                                 | HP:0000821                                                                         | 30.00%     |
| Female: Hydronephrosis <i>and</i> septate vagina                                               | HP:0000126 <i>and</i> HP:0001153                                                   | 25.00%     |
| Male: Hydronephrosis <i>and</i> cryptorchidism <i>and</i> micropenis<br><i>and</i> hypospadias | HP:0000126 <i>and</i> HP:0000028<br><i>and</i> HP:0000054 <i>and</i><br>HP:0000047 | 25.00%     |
| Rectovaginal fistula                                                                           | HP:0000143                                                                         | 18.00%     |
| Transverse palmar crease                                                                       | HP:0000954                                                                         | occasional |
| Diabetes mellitus                                                                              | HP:0000819                                                                         | occasional |
| Hypoplastic nipples                                                                            | HP:0002557                                                                         | occasional |
| Skull defect                                                                                   | HP:0001362                                                                         | occasional |
| Strabismus                                                                                     | HP:0000486                                                                         | occasional |
| Fifth finger clinodactyly                                                                      | HP:0001158                                                                         | occasional |
| EEG abnormalities                                                                              | HP:0002253                                                                         | occasional |
| Cardiac abnormalities                                                                          | HP:0001627                                                                         | occasional |
| Abdominal situs inversus <i>and</i> situs inversus                                             | HP:0003362 <i>and</i> HP:0001696                                                   | occasional |
| Cafe-au-lait-spots                                                                             | HP:0000957                                                                         | occasional |

Inheritance: Autosomal recessive

Table S26: **Johanson-Blizzard syndrome** [MIM 243800]. Feature frequencies according to [3].

| HPO Term                                   | Term ID    | Frequency |
|--------------------------------------------|------------|-----------|
| Wide palpebral fissures                    | HP:0000637 | 95.00%    |
| Eversion of lateral third of lower eyelids | HP:0007655 | 90.00%    |
| Developmental delay                        | HP:0000754 | 87.00%    |
| Persistent fetal fingertip pads            | HP:0001235 | 82.00%    |
| Thick, arched eyebrows                     | HP:0004533 | 79.00%    |
| Large, prominent ears                      | HP:0000382 | 79.00%    |
| Flat nasal tip                             | HP:0000437 | 71.00%    |
| Short Stature                              | HP:0001509 | 64.00%    |
| Short fifth finger                         | HP:0004211 | 62.00%    |
| Hyperextensible joints                     | HP:0001378 | 52.00%    |
| Recurrent infections                       | HP:0002719 | 48.00%    |
| Dental abnormality                         | HP:0000164 | 48.00%    |
| Cleft palate                               | HP:0000175 | 44.00%    |
| High-arched palate                         | HP:0000156 | 44.00%    |
| cardiac abnormality                        | HP:0001627 | 37.00%    |
| Feeding difficulties                       | HP:0002022 | 35.00%    |
| Hypotonia                                  | HP:0001318 | 30.00%    |
| Microcephaly                               | HP:0000252 | 25.00%    |
| Genitourinary abnormality                  | HP:0000119 | 23.00%    |
| Strabismus                                 | HP:0000486 | 22.00%    |
| Blue sclerae                               | HP:0000592 | 21.00%    |
| Micrognathia                               | HP:0000210 | 16.00%    |
| Congenital hip dislocations                | HP:0001374 | 11.00%    |
| Ptosis                                     | HP:0000508 | 11.00%    |
| Broad nasal root                           | HP:0000424 | 9.00%     |
| Seizures                                   | HP:0001250 | 8.00%     |

Inheritance: Autosomal dominant

Table S27: **Kabuki Syndrome [MIM 147920]**. Feature frequencies according to [19].

| HPO Term                      | Term ID    | Frequency |
|-------------------------------|------------|-----------|
| Small chest                   | HP:0001590 | 12/12     |
| Short, curved femora          | HP:0009749 | 12/12     |
| Metaphyseal flaring           | HP:0003015 | 12/12     |
| Severe micromelia             | HP:0003030 | 12/12     |
| Short, flared ribs            | HP:0009750 | 10/12     |
| Malar hypoplasia              | HP:0000272 | 8/12      |
| Tibial bowing                 | HP:0002982 | 7/12      |
| Radial bowing                 | HP:0002986 | 7/12      |
| Metacarpal hypoplasia         | HP:0005695 | typical   |
| Short, dumbbell-shaped humeri | HP:0005009 | typical   |
| Decreased mobility of joints  | HP:0001376 | 6/12      |
| Platyspondyly                 | HP:0000926 | 5/12      |
| Horizontal acetabular roof    | HP:0003171 | 5/12      |
| Micrognathia                  | HP:0000210 | 4/12      |
| Ulnar hypoplasia              | HP:0003022 | 2/12      |
| Talipes equinovarus           | HP:0001762 | 2/12      |
| Bowed ulna                    | HP:0003031 | 1/12      |

Inheritance: Autosomal recessive

Table S28: **Kyphomelic Dysplasia** [MIM 211350]. Feature frequencies according to [20].

| HPO Term                                                                                                                               | Term ID                                                                                        | Frequency  |
|----------------------------------------------------------------------------------------------------------------------------------------|------------------------------------------------------------------------------------------------|------------|
| Short radius <i>and</i> Short ulna                                                                                                     | HP:0002995 <i>and</i> HP:0002998                                                               | 95%        |
| Bifid thumb                                                                                                                            | HP:0001244                                                                                     | 95%        |
| Preaxial polydactyly                                                                                                                   | HP:0001177                                                                                     | 95%        |
| Aplasia of the 1st finger <i>and</i> Absent ossification/absence of radius                                                             | HP:0009637 <i>and</i> HP:0003974                                                               | 95%        |
| 2-3 finger syndactyly                                                                                                                  | HP:0001233                                                                                     | 95%        |
| Broad halluces                                                                                                                         | HP:0001834                                                                                     | 95%        |
| Bilateral digitalized thumbs                                                                                                           | HP:0005707                                                                                     | 95%        |
| Triphalangeal thumb                                                                                                                    | HP:0001199                                                                                     | 95%        |
| Clinodactyly, 3,5 finger                                                                                                               | HP:0006181                                                                                     | 95%        |
| Thenar hypoplasia                                                                                                                      | HP:0001245                                                                                     | 95%        |
| Hypodontia <i>and/or</i> Peg-shaped incisors <i>and/or</i> Hypoplastic dental enamel <i>and/or</i> Delayed eruption of deciduous teeth | HP:0000668 <i>and/or</i><br>HP:0000673 <i>and/or</i><br>HP:0006297 <i>and/or</i><br>HP:0000680 | 90%        |
| Simple, cup-shaped ears <i>and</i> Hypoplastic antihelix                                                                               | HP:0008531 <i>and</i> Hypoplastic antihelix                                                    | 70%        |
| Mixed hearing loss                                                                                                                     | HP:0000410                                                                                     | 55%        |
| Severe dental caries                                                                                                                   | HP:00006295                                                                                    | typical    |
| Aplastic/hypoplastic lacrimal puncta                                                                                                   | HP:0007892                                                                                     | 45%        |
| Alacrima <i>and</i> Aplastic/hypoplastic lacrimal glands                                                                               | HP:0000522 <i>and</i> HP:0008038                                                               | 40%        |
| Nasolacrimal duct obstruction                                                                                                          | HP:0000579                                                                                     | main       |
| Downward slanting palpebral fissures                                                                                                   | HP:0000494                                                                                     | occasional |
| Renal agenesis                                                                                                                         | HP:0000104                                                                                     | occasional |
| Coronal hypospadias                                                                                                                    | HP:0008743                                                                                     | occasional |
| Aplasia of the parotid gland <i>and</i> Absence of Stensen duct                                                                        | HP:0009740 <i>and</i> HP:0000198                                                               | occasional |
| Hypertelorismus <i>or</i> Telecanthus                                                                                                  | HP:0000316 <i>or</i> HP:0000506                                                                | occasional |
| Nephrosclerosis                                                                                                                        | HP:00009741                                                                                    | occasional |

Inheritance: Autosomal dominant

Table S29: **Lacrimoauriculodentodigital syndrome type 1** [MIM **149730**]. Also known as Levy-Hollister syndrome. Feature frequencies according to [3].

| HPO Term                                                                                             | Term ID    | Frequency                 |
|------------------------------------------------------------------------------------------------------|------------|---------------------------|
| Mental retardation, moderate to severe                                                               | HP:0002316 | 100.00%                   |
| Seizures                                                                                             | HP:0001250 | 90.00%                    |
| Microcephaly                                                                                         | HP:0000252 | 84.00%                    |
| Megacolon                                                                                            | HP:0002029 | 62.00%                    |
| Pointer chin                                                                                         | HP:0000307 | typical                   |
| Prominent nasal tip                                                                                  | HP:0005274 | typical                   |
| Downward slanting palpebral fissures                                                                 | HP:0000494 | typical                   |
| Ptosis                                                                                               | HP:0000508 | typical                   |
| Deep-set eyes                                                                                        | HP:0000490 | typical                   |
| Constipation                                                                                         | HP:0002019 | typical                   |
| Short stature                                                                                        | HP:0001509 | typical                   |
| Columella extends below the ala nasi                                                                 | HP:0009766 | typical                   |
| Hypertelorism                                                                                        | HP:0000316 | typical                   |
| Wide nasal bridge                                                                                    | HP:0000431 | typical                   |
| Fleshy upturned lobules                                                                              | HP:0009764 | typical                   |
| Cup-shaped ears                                                                                      | HP:0000378 | typical                   |
| Iris coloboma                                                                                        | HP:0000612 | typical                   |
| Impaired speech development                                                                          | HP:0002116 | typical                   |
| Esotropia                                                                                            | HP:0000565 | typical                   |
| Agenesis of corpus callosum                                                                          | HP:0001274 | 42.00%                    |
| Abdominal distension                                                                                 | HP:0003720 | frequent                  |
| Male: Bifid scrotum <i>and/or</i> Cryptorchidism <i>and/or</i> Hypospadias                           | HP:0000048 | <i>and/or</i><br>frequent |
|                                                                                                      | HP:0000028 | <i>and/or</i>             |
|                                                                                                      | HP:0000047 |                           |
| Barium enema shows transition zone between aganglionic contracted segment and dilated proximal bowel | HP:0002606 | frequent                  |
| Submucous cleft palate                                                                               | HP:0000176 | occasional                |
| Inheritance: Autosomal dominant                                                                      |            |                           |

Table S30: **Mowat-Wilson syndrome [MIM 235730]**. Feature frequencies according to [21].

| HPO Term                              | Term ID    | Frequency |
|---------------------------------------|------------|-----------|
| Scoliosis                             | HP:0002650 | 10/10     |
| Camptodactyly (feet)                  | HP:0001836 | 11/11     |
| Micrognathia                          | HP:0000210 | 11/11     |
| Dysplastic patella                    | HP:0006446 | 5/5       |
| Contractures                          | HP:0001371 | 11/11     |
| Bilateral camptodactyly               | HP:0005617 | 11/11     |
| Low-set ears                          | HP:0000369 | 10/11     |
| Short stature                         | HP:0001509 | 10/11     |
| Ptosis                                | HP:0000508 | 9/11      |
| Downward-slanting palpebral fissures  | HP:0000494 | 9/11      |
| Female: Absence of labia majora       | HP:0008729 | 4/5       |
| Neonatal respiratory distress         | HP:0002643 | 8/11      |
| Talipes equinovarus                   | HP:0001762 | 8/11      |
| Downturned corners of mouth           | HP:0002714 | 8/11      |
| Kyphosis                              | HP:0002808 | 7/10      |
| Male: Cryptorchidism                  | HP:0000028 | 2/3       |
| Neck pterygia                         | HP:0009759 | 7/11      |
| Popliteal pterygia                    | HP:0009756 | 6/11      |
| Syndactyly                            | HP:0001159 | 6/11      |
| Epicanthal folds                      | HP:0000286 | 6/11      |
| Microstomia                           | HP:0000160 | typical   |
| Long philtrum                         | HP:0000343 | 5/11      |
| Dislocated radial head                | HP:0003083 | 3/7       |
| Axillary pterygium                    | HP:0001060 | 4/11      |
| Fused cervical vertebrae              | HP:0002949 | 3/10      |
| Anterior clefting of vertebral bodies | HP:0009761 | 3/10      |
| Antecubital pterygium                 | HP:0009760 | 3/11      |
| Hearing loss, conductive              | HP:0000405 | 3/11      |
| Rib fusion                            | HP:0000902 | 2/9       |
| Intercrural pterygium                 | HP:0009757 | 2/11      |
| Cleft palate                          | HP:0000175 | 2/11      |

Inheritance: Autosomal recessive

Table S31: **Multiple pterygium syndrome, Escobar variant** [MIM **265000**]. Feature frequencies according to [22].



| HPO Term                                                               | Term ID                                | Frequency                                 |
|------------------------------------------------------------------------|----------------------------------------|-------------------------------------------|
| Koilonychia <i>and/or</i> Anonychia <i>and/or</i> Longitudinal ridging | HP:0001598<br>HP:0001798<br>HP:0001801 | <i>and/or</i><br><i>and/or</i><br>117/119 |
| Absent distal interphalangeal creases                                  | HP:0001032                             | 114/119                                   |
| Aplasia/Hypoplasia of the patella                                      | HP:0006498                             | 200/237                                   |
| Limited elbow extension                                                | HP:0001377                             | 167/240                                   |
| Iliac horns                                                            | HP:0009780                             | 34/50                                     |
| Pes planus                                                             | HP:0001763                             | 76/118                                    |
| Lester's sign                                                          | HP:0009781                             | 64/119                                    |
| Increased lumbar lordosis                                              | HP:0002941                             | 41/87                                     |
| Pectus excavatum                                                       | HP:0000767                             | 14/39                                     |
| Scoliosis                                                              | HP:0002650                             | 8/35                                      |
| Talipes equinovarus                                                    | HP:0001762                             | 23/122                                    |
| Antecubital pterygium                                                  | HP:0009760                             | 15/123                                    |
| Glaucoma                                                               | HP:0000501                             | 8/83                                      |
| Quadriceps aplasia                                                     | HP:0009788                             | occasional                                |
| Triceps aplasia                                                        | HP:0009785                             | occasional                                |
| Biceps aplasia                                                         | HP:0009783                             | occasional                                |
| Pectoralis minor aplasia                                               | HP:0005255                             | occasional                                |
| Inheritance: Autosomal dominant                                        |                                        |                                           |

Table S32: **Nail-Patella Syndrome** [MIM 161200]. Feature frequencies according to [23].

| HPO Term               | Term ID    | Frequency |
|------------------------|------------|-----------|
| Neurofibromas          | HP:0001067 | 100.00%   |
| Cafe-au-lait spots     | HP:0000957 | 100.00%   |
| Lisch nodules          | HP:0009737 | 95.00%    |
| Freckling              | HP:0001480 | 67.00%    |
| Macrocephaly           | HP:0000256 | 45.00%    |
| Short stature          | HP:0001509 | 31.00%    |
| Learning disability    | HP:0001328 | 30.00%    |
| Plexiform neurofibroma | HP:0009732 | 30.00%    |
| Scoliosis              | HP:0002650 | 5.00%     |
| Epilepsy               | HP:0001275 | 4.00%     |
| Tibial pseudarthrosis  | HP:0009736 | 4.00%     |
| Renal artery stenosis  | HP:0001920 | 1.5%      |
| Spinal neurofibromas   | HP:0009735 | 1.5%      |
| Hypsarrhythmia         | HP:0002521 | 1.5%      |
| Optic glioma           | HP:0009734 | 1.5%      |
| Rhabdomyosarcoma       | HP:0002857 | 1.5%      |
| Aqueduct stenosis      | HP:0002410 | 1.5%      |
| Pheochromocytoma       | HP:0002666 | 1.00%     |
| Meningioma             | HP:0002858 | Very rare |
| Glaucoma               | HP:0000501 | 0.7%      |

Inheritance: Autosomal dominant

Table S33: **Neurofibromatosis type 1 [MIM 162200]**. Feature frequencies according to [24].

| HPO Term                                            | Term ID    | Frequency  |
|-----------------------------------------------------|------------|------------|
| Bilateral vestibular schwannoma                     | HP:0009589 | 85.00%     |
| Juvenile posterior subcapsular lenticular opacities | HP:0007935 | 72.00%     |
| Peripheral schwannoma                               | HP:0009593 | 68.00%     |
| Meningioma                                          | HP:0002858 | 45.00%     |
| Occasional cafe-au-lait spots                       | HP:0005601 | 43.00%     |
| Juvenile cortical cataract                          | HP:0007876 | 41.00%     |
| Hearing loss                                        | HP:0000365 | 35.00%     |
| Occasional neurofibromas                            | HP:0009595 | 27.00%     |
| Tinnitus                                            | HP:0000360 | 10.00%     |
| Retinal hamartoma                                   | HP:0009594 | 9.00%      |
| Ataxia                                              | HP:0001251 | 8.00%      |
| Headache                                            | HP:0000266 | occasional |
| Unilateral vestibular schwannoma                    | HP:0009590 | 6.00%      |
| Astrocytoma                                         | HP:0009592 | 4.00%      |
| Ependymoma                                          | HP:0002888 | 2.5%       |

Inheritance: Autosomal dominant

Table S34: **Neurofibromatosis type 2 [MIM 101000]**. Feature frequencies according to [25] and [26].

| HPO Term                                                                          | Term ID                          | Frequency            |
|-----------------------------------------------------------------------------------|----------------------------------|----------------------|
| Mental retardation                                                                | HP:0001249                       | 97.00%               |
| Frontal bossing                                                                   | HP:0000254                       | 95.00%               |
| Frontal hair upsweep                                                              | HP:0002236                       | 91.00%               |
| Motor retardation <i>and/or</i> muscular hypotonia                                | HP:0001270                       | <i>and/or</i> 90.00% |
|                                                                                   | HP:0001252                       |                      |
| Downward slanting palpebral fissures                                              | HP:0000494                       | 85.00%               |
| Ocular hypertelorismus                                                            | HP:0000316                       | 83.00%               |
| Broad thumbs and broad great toes                                                 | HP:0005833                       | 81.00%               |
| Wide anterior fontanel                                                            | HP:0000260                       | 77.00%               |
| Macrocephaly, postnatal                                                           | HP:0005490                       | 74.00%               |
| Seizures                                                                          | HP:0001250                       | 70.00%               |
| Hyperactivity <i>and</i> Attention deficit disorder                               | HP:0000752 <i>and</i> HP:0001577 | 70.00%               |
| Constipation                                                                      | HP:0002019                       | 69.00%               |
| Abnormalitiy of the sternum                                                       | HP:0000766                       | 69.00%               |
| Small, simple ears                                                                | HP:0000379                       | 66.00%               |
| Mild vertebral anomalies                                                          | HP:0005719                       | 64.00%               |
| Transverse palmar crease                                                          | HP:0000954                       | 60.00%               |
| Epicanthal folds                                                                  | HP:0000286                       | 56.00%               |
| Camptodactyly                                                                     | HP:0001160                       | 55.00%               |
| Syndactyly                                                                        | HP:0001159                       | 54.00%               |
| Clinodactyly                                                                      | HP:0001157                       | 53.00%               |
| Strabismus                                                                        | HP:0000486                       | 52.00%               |
| Persistent fetal fingertip pads                                                   | HP:0001235                       | 50.00%               |
| Prominent lower lip                                                               | HP:0000179                       | 44.00%               |
| Anal stenosis <i>and/or</i> imperforate anus <i>and/or</i> anteriorly placed anus | HP:0002025                       | <i>and/or</i> 38.00% |
|                                                                                   | HP:0001150                       | <i>and/or</i>        |
|                                                                                   | HP:0001545                       |                      |
| Cryptorchidism                                                                    | HP:0000028                       | 36.00%               |
| Postnatal short stature                                                           | HP:0003501                       | main                 |
| Sacral dimple                                                                     | HP:0000960                       | main                 |
| Partial or complete agenesis of the corpus callosum                               | HP:0007090                       | main                 |
| Narrow palate                                                                     | HP:0000189                       | main                 |
| Multiple joint contractures                                                       | HP:0002828                       | main                 |
| Facial wrinkling                                                                  | HP:0009762                       | main                 |
| Sparse hair <i>and</i> Fine hair                                                  | HP:0008070 <i>and</i> HP:0002213 | main                 |
| Cardiac abnormality                                                               | HP:0001627                       | occasional           |
| High-pitched voice                                                                | HP:0001620                       | occasional           |
| Sensorineural deafness                                                            | HP:0000374                       | occasional           |
| Ectrodactyly                                                                      | HP:0001171                       | occasional           |
| Short neck                                                                        | HP:0000470                       | occasional           |
| Hydrocephalus                                                                     | HP:0000236                       | occasional           |
| Cleft palate                                                                      | HP:0000175                       | occasional           |
| Pyloric stenosis                                                                  | HP:0002021                       | occasional           |
| Neuronal migration disorder                                                       | HP:0002269                       | occasional           |
| Choanal atresia                                                                   | HP:0000453                       | occasional           |
| Hypospadias                                                                       | HP:0000047                       | occasional           |
| Intestinal malrotation                                                            | HP:0002026                       | occasional           |

Inheritance: X-linked recessive

Table S35: **Opitz-Kaveggia Syndrome [MIM 305450]**. Note that the Opitz-Kaveggia syndrome is also known as FG syndrome-1. Feature frequencies according to [3].

| HPO Term                                                                                              | Term ID                                | Frequency                               |
|-------------------------------------------------------------------------------------------------------|----------------------------------------|-----------------------------------------|
| Cleft palate                                                                                          | HP:0000175                             | 53/57                                   |
| Popliteal pterygium                                                                                   | HP:0009756                             | 33/57                                   |
| Cleft lip                                                                                             | HP:0000204                             | 33/57                                   |
| Cutaneous syndactyly                                                                                  | HP:0005637                             | 29/57                                   |
| Lower lip pits                                                                                        | HP:0000196                             | 26/57                                   |
| Syngnathia                                                                                            | HP:0009754                             | 23/57                                   |
| Male: Scrotal hypoplastic <i>and/or</i> Bifidscrotum <i>and/or</i><br>Cryptorchidism                  | HP:0000046<br>HP:0000048<br>HP:0000028 | <i>and/or</i><br><i>and/or</i><br>21/57 |
| Female: Hypoplastic uterus <i>and/or</i> Hypoplastic vagina<br><i>and/or</i> Hypoplastic labia majora | HP:0000013<br>HP:0000726<br>HP:0000059 | <i>and/or</i><br><i>and/or</i><br>21/57 |
| Pyramidal skinfold extending from the base to the top of the<br>nails                                 | HP:0009758                             | 19/57                                   |
| Ankyloblepharon                                                                                       | HP:0009755                             | 10/57                                   |
| Talipes equinovarus                                                                                   | HP:0001762                             | 8/57                                    |
| Intercrural pterygium                                                                                 | HP:0009757                             | 5/57                                    |
| Spina bifida occulta                                                                                  | HP:0003298                             | occasional                              |

Inheritance: Autosomal dominant

Table S36: **Popliteal Pterygium syndrome** [MIM 119500]. Feature frequencies according to [27].

| HPO Term                                                                                    | Term ID                                              | Frequency  |
|---------------------------------------------------------------------------------------------|------------------------------------------------------|------------|
| Mental retardation                                                                          | HP:0001249                                           | 100.00%    |
| Broad great toes                                                                            | HP:0003094                                           | 100.00%    |
| Hypoplastic maxilla <i>and</i> Narrow palate                                                | HP:000032 <i>and</i> HP:0000189                      | 100.00%    |
| Beaked nose                                                                                 | HP:0000444                                           | 90.00%     |
| Short columella                                                                             | HP:0002000                                           | 90.00%     |
| Poor speech                                                                                 | HP:0002465                                           | 90.00%     |
| Downward slanting palpebral fissures                                                        | HP:0000494                                           | 88.00%     |
| Long eyelashes                                                                              | HP:0000527                                           | 87.00%     |
| Broad thumbs                                                                                | HP:0001173                                           | 87.00%     |
| Unsteady gait                                                                               | HP:0002317                                           | 85.00%     |
| Abnormal form of ears                                                                       | HP:0000377                                           | 84.00%     |
| Male: Cryptorchidism                                                                        | HP:0000028                                           | 78.00%     |
| Heavy eyebrows                                                                              | HP:0000574                                           | 76.00%     |
| Hirsutism                                                                                   | HP:0001007                                           | 75.00%     |
| Delayed skeletal maturation                                                                 | HP:0002750                                           | 74.00%     |
| Highly arched eyebrows                                                                      | HP:0001584                                           | 73.00%     |
| Pes planus                                                                                  | HP:0001763                                           | 72.00%     |
| Deviated nasal septum                                                                       | HP:0004411                                           | 71.00%     |
| Strabismus                                                                                  | HP:0000486                                           | 69.00%     |
| Hypotonia                                                                                   | HP:0001318                                           | 67.00%     |
| Fifth finger clinodactyly                                                                   | HP:0001158                                           | 62.00%     |
| EEG abnormality                                                                             | HP:0002353                                           | 57.00%     |
| Small opening of mouth                                                                      | UPDATE                                               | 56.00%     |
| Epicanthal folds                                                                            | HP:0000286                                           | 55.00%     |
| Spina bifida occulta                                                                        | HP:0003298                                           | 47.00%     |
| Nasolacrimal duct obstruction                                                               | HP:0000579                                           | 43.00%     |
| Scoliosis                                                                                   | HP:0002650                                           | 42.00%     |
| Low posterior hairline                                                                      | HP:0002162                                           | 42.00%     |
| Wide anterior fontanel                                                                      | HP:0000260                                           | 41.00%     |
| Hyperreflexia                                                                               | HP:0001282                                           | 40.00%     |
| Microcephaly                                                                                | HP:0000252                                           | 35.00%     |
| Frontal bossing                                                                             | HP:0000254                                           | 33.00%     |
| Atrial septal defect <i>or</i> Ventricular septal defect <i>or</i> patent ductus arteriosus | HP:0001631 <i>or</i> HP:0001629 <i>or</i> HP:0001643 | 33.00%     |
| Deep plantar crease between first and second toes                                           | HP:0008107                                           | 33.00%     |
| Persistent fetal fingertip pads                                                             | HP:0001135                                           | 31.00%     |
| Small, flared iliac wings                                                                   | HP:0003181                                           | 26.00%     |
| Postnatal growth deficiency                                                                 | HP:0001514                                           | main       |
| Capillary hemangiomas                                                                       | HP:0005306                                           | 25.00%     |
| Low frontal hairline                                                                        | HP:0000294                                           | 24.00%     |
| Delayed closure of fontanel                                                                 | HP:0000270                                           | 24.00%     |
| Seizures                                                                                    | HP:0001250                                           | 23.00%     |
| Enophthalmos                                                                                | HP:0000663                                           | 22.00%     |
| Frontal hair up-sweep                                                                       | HP:0002236                                           | 20.00%     |
| Transverse palmar creases                                                                   | HP:0000954                                           | occasional |
| Large foramen magnum                                                                        | HP:0002700                                           | occasional |
| Ptosis                                                                                      | HP:0000508                                           | occasional |
| Micrognathia                                                                                | HP:0000210                                           | occasional |
| Polydactyly                                                                                 | HP:0001161                                           | occasional |
| Abnormality of the sternum                                                                  | HP:0000766                                           | occasional |
| Male: Shawl scrotum                                                                         | HP:0000049                                           | occasional |
| Syndactyly                                                                                  | HP:0001159                                           | occasional |
| Male: Hypospadias                                                                           | HP:0000047                                           | occasional |
| Caf-au-lait spots                                                                           | HP:0000957                                           | occasional |
| Glaucoma                                                                                    | HP:0000501                                           | occasional |
| Parietal foramina                                                                           | HP:0002697                                           | occasional |
| Dislocation of patella                                                                      | HP:0002999                                           | occasional |
| Cataract                                                                                    | HP:0000518                                           | occasional |

Inheritance: Autosomal dominant

Table S37: **Rubinstein-Taybi syndrome** [MIM 180849]. Feature frequencies according to [3].

| HPO Term                             | Term ID    | Frequency |
|--------------------------------------|------------|-----------|
| Arachnodactyly                       | HP:0001166 | 34/37     |
| Micrognathia                         | HP:0000210 | 33/37     |
| Developmental delay                  | HP:0000754 | 32/37     |
| Low-set, posteriorly rotated ears    | HP:0000368 | 32/37     |
| Downward slanting palpebral fissures | HP:0000494 | 31/37     |
| Abnormality of the sternum           | HP:0000766 | 30/37     |
| High-arched palate                   | HP:0000156 | 30/37     |
| Exophthalmos                         | HP:0000645 | 29/37     |
| Dolichocephaly                       | HP:0000268 | 28/37     |
| Hypertelorism                        | HP:0000316 | 28/37     |
| Hypotonia                            | HP:0001318 | 26/37     |
| Camptodactyly                        | HP:0001160 | 24/37     |
| Scoliosis                            | HP:0002650 | 23/37     |
| Increased mobility of joints         | HP:0001382 | 21/37     |
| Abnormal form of ears                | HP:0000377 | 20/37     |
| Inguinal hernia                      | HP:0000023 | 19/37     |
| Craniosynostosis                     | HP:0001363 | 18/37     |
| High, prominent forehead             | HP:0000254 | 17/37     |
| Strabismus                           | HP:0000486 | 17/37     |
| Ptosis                               | HP:0000508 | 16/37     |
| Maxillary hypoplasia                 | HP:0000327 | 16/37     |
| Umbilical hernia                     | HP:0001537 | 13/37     |
| Mitral valve prolapse                | HP:0001634 | 13/37     |
| Talipes equinovarus                  | HP:0001762 | 13/37     |
| Hydrocephalus                        | HP:0000238 | 13/37     |
| Abnormality of the vertebral column  | HP:0000925 | 10/37     |
| Reduced subcutaneous adipose tissue  | HP:0003758 | 10/37     |
| Osteopenia                           | HP:0000938 | 10/37     |
| Wide anterior fontanel               | HP:0000260 | 9/37      |
| Feeding difficulties                 | HP:0002022 | 9/37      |
| Shallow orbits                       | HP:0000586 | 9/37      |
| Myopia                               | HP:0000545 | 9/39      |
| Upturned nose                        | HP:0000427 | 9/39      |
| Aortic dilatation                    | HP:0001724 | 8/37      |
| Joint contractures                   | HP:0001372 | 7/37      |
| Skin hyperelasticity                 | HP:0007389 | 7/37      |
| Microcephaly                         | HP:0000252 | 6/37      |
| Obstructive sleep apnea              | HP:0002870 | 6/37      |
| Hooked clavicles                     | HP:0000895 | 6/37      |
| Bowing of the long bones             | HP:0006487 | 5/37      |
| Dislocated radial head               | HP:0003083 | 5/37      |
| Abdominal wall muscle weakness       | HP:0009023 | 5/37      |
| Supernumerary ribs                   | HP:0005815 | 5/37      |
| Hearing loss, conductive             | HP:0000405 | 5/37      |
| Genu valgum                          | HP:0002857 | 4/37      |
| Widened metaphyses                   | HP:0003016 | 4/37      |
| Gastroesophageal reflux              | HP:0002020 | 4/37      |
| Cryptorchidism                       | HP:0000028 | 4/37      |

Inheritance: Isolated cases

Table S38: **Shprintzen-Goldberg Craniosynostosis Syndrome** [MIM **182212**]. Feature frequencies according to [28].

| HPO Term                                                         | Term ID    | Frequency            |
|------------------------------------------------------------------|------------|----------------------|
| 2-3 toe syndactyly                                               | HP:0004691 | 99.00%               |
| Mental retardation                                               | HP:0001249 | 156/164              |
| Flat, broad nasal bridge                                         | HP:0000439 | hallmark             |
| Microcephaly                                                     | HP:0000252 | 138/164              |
| Failure to thrive                                                | HP:0001508 | 134/164              |
| Anteverted nostrils                                              | HP:0000463 | 123/164              |
| Ptosis                                                           | HP:0000508 | 115/164              |
| Micrognathia                                                     | HP:0000210 | typical              |
| Long philtrum                                                    | HP:0000343 | typical              |
| Feeding difficulties                                             | HP:0002022 | typical              |
| Bitemporal narrowing                                             | HP:0000314 | typical              |
| Hypoplastic corpus callosum                                      | HP:0002079 | common               |
| Hypoplastic thumb                                                | HP:0009628 | typical              |
| Frontal lobe hypoplasia                                          | HP:0002424 | common               |
| Male: Hypospadias                                                | HP:0000047 | common               |
| Periventricular gray matter heterotopias                         | HP:0007165 | typical              |
| Broad alveolar ridges                                            | HP:0000187 | typical              |
| Postaxial polydactyly (feet) <i>and/or</i> Postaxial polydactyly | HP:0001830 | <i>and/or</i> 79/164 |
|                                                                  | HP:0001162 |                      |
| Cleft palate                                                     | HP:0000175 | 77/164               |
| Defective lung lobation                                          | HP:0009753 | 74/164               |
| Posteriorly rotated ears                                         | HP:0000358 | frequent             |
| Renal agenesis                                                   | HP:0000104 | frequent             |
| Hydronephrosis                                                   | HP:0000121 | frequent             |
| Low-set ears                                                     | HP:0000369 | frequent             |
| Cataract                                                         | HP:0000518 | 36/164               |
| Atrial septal defect                                             | HP:0001631 | 20.00%               |
| Patent ductus arteriosus                                         | HP:0001643 | 18.00%               |
| Pyloric stenosis                                                 | HP:0002021 | 23/164               |
| Ventricular septal defect                                        | HP:0001629 | 10.00%               |
| Hypertelorism                                                    | HP:0000316 | occasional           |
| Epicanthal folds                                                 | HP:0000286 | occasional           |
| Inheritance: Autosomal recessive                                 |            |                      |

Table S39: **Smith-Lemli-Opitz Syndrome** [MIM 270400]. Feature frequencies according to [29].



| HPO Term                                         | Term ID                          | Frequency  |
|--------------------------------------------------|----------------------------------|------------|
| Ectrodactyly                                     | HP:0001171                       | 99/134     |
| Aplasia the tibia                                | HP:0009556                       | 79/134     |
| Aplasia/hypoplasia of the ulna                   | HP:0006495                       | 16/134     |
| Absent fingers                                   | HP:0004093                       | occasional |
| Metatarsus adductus                              | HP:0001768                       | occasional |
| Lower limb hypotrophy                            | HP:0007210                       | occasional |
| Preaxial polydactyly                             | HP:0001177                       | occasional |
| Knee contractures <i>and</i> Patellar hypoplasia | HP:0002978 <i>and</i> HP:0003065 | occasional |
| Syndactyly                                       | HP:0001159                       | occasional |
| Aplasia/hypoplasia of the humerus                | HP:0006507                       | occasional |
| Talipes equinovarus                              | HP:0001762                       | occasional |
| Proximally placed thumbs                         | HP:0001170                       | occasional |
| Monodactyly                                      | HP:0004058                       | occasional |
| Aplasia/hypoplasia of the radius                 | HP:0006501                       | occasional |
| Craniosynostosis                                 | HP:0001363                       | occasional |
| Aplasia/hypoplasia of femur                      | HP:0005613                       | occasional |
| Ectrodactyly (feet)                              | HP:0001839                       | occasional |
| Aplastic/hypoplastic halluces                    | HP:0008118                       | 8/134      |
| Postaxial polydactyly                            | HP:0001162                       | 6/134      |
| Cup-shaped ears                                  | HP:0000378                       | 2/134      |

Inheritance: autosomal dominant with widely variable expression and frequent nonpenetrance in normal obligate carriers

Table S40: **Split-Hand/foot Malformation with long bone deficiency 1 (SHFLD1)** [MIM 119100]. Feature frequencies according to [3] and [30].

| HPO Term                                                            | Term ID    | Frequency                |
|---------------------------------------------------------------------|------------|--------------------------|
| Preaxial polydactyly                                                | HP:0001177 | common                   |
| Sensorineural deafness                                              | HP:0000374 | typical                  |
| Triphalangeal thumb                                                 | HP:0001199 | common                   |
| Microtia <i>or</i> Preauricular pit <i>or</i> Preauricular skin tag | HP:0000393 | <i>and/or</i><br>typical |
|                                                                     | HP:0000392 | <i>and/or</i>            |
|                                                                     | HP:0000384 |                          |
| Fifth toe clinodactyly                                              | HP:0001864 | common                   |
| Anal atresia                                                        | HP:0002023 | 31/66                    |
| Multicystic kidneys                                                 | HP:0000003 | occasional               |
| Renal failure                                                       | HP:0000083 | occasional               |
| Renal dysplasia                                                     | HP:0000110 | occasional               |
| 2-3 and 3-4 finger syndactyly                                       | HP:0006018 | occasional               |
| Renal hypoplasia                                                    | HP:0000089 | occasional               |
| Vesicoureteral reflux                                               | HP:0000076 | occasional               |
| Inheritance: Autosomal dominant                                     |            |                          |

Table S41: **Townes-Brocks Syndrome** [MIM 107480]. Feature frequencies according to [31].

| HPO Term                                    | Term ID    | Frequency  |
|---------------------------------------------|------------|------------|
| Malar hypoplasia                            | HP:0000272 | 89.00%     |
| Downward slanting palpebral fissures        | HP:0000494 | 89.00%     |
| Mandibular hypoplasia                       | HP:0000347 | 78.00%     |
| Abnormal form of ears                       | HP:0000377 | 77.00%     |
| Lower eyelid coloboma                       | HP:0000652 | 69.00%     |
| Partial-total absence of lower eyelashes    | HP:0007785 | 53.00%     |
| Conductive deafness                         | HP:0000367 | 40.00%     |
| Visual loss                                 | HP:0000572 | 37.00%     |
| auditory canal abnormality                  | HP:0000372 | 36.00%     |
| Cleft soft palate                           | HP:0000185 | 32.00%     |
| Cleft palate                                | HP:0000175 | 28.00%     |
| Projection of scalp hair onto lateral cheek | HP:0009554 | 26.00%     |
| Hypoplasia of the pharynx                   | HP:0009555 | occasional |
| Microstomia                                 | HP:0000160 | occasional |
| Ptosis                                      | HP:0000508 | occasional |
| Abnormality of the parotid gland            | HP:0000197 | occasional |
| Upper eyelid coloboma                       | HP:0000636 | occasional |
| Preauricular sinus                          | PH:0004467 | occasional |
| Strabismus                                  | HP:0000486 | occasional |
| Cryptorchism                                | HP:0000028 | occasional |
| Macrostomia                                 | HP:0000181 | occasional |
| Nasolacrimal duct stenosis                  | HP:0007678 | occasional |
| Preauricular skin tag                       | HP:0000384 | occasional |
| Microphthalmia, bilateral                   | HP:0001585 | occasional |
| Choanal atresia                             | HP:0000453 | occasional |
| Cardiac malformation                        | HP:0002564 | occasional |
| Mental retardation                          | HP:0001249 | 5.00%      |

Inheritance: autosomal dominant

Table S42: **Treacher Collins Syndrome [MIM 154500]**. Feature frequencies according to [3] and [32].

| HPO Term                                | Term ID                         | Frequency |
|-----------------------------------------|---------------------------------|-----------|
| Subependymal nodules                    | HP:0009716                      | 95.00%    |
| Cerebral hamartomata                    | HP:0009731                      | 93.00%    |
| Cortical tubers                         | HP:0000717                      | 93.00%    |
| Facial angiofibromas                    | HP:0009720                      | 85.00%    |
| Hypomelanotic macules                   | HP:0009719                      | 82.00%    |
| Seizures <i>or</i> Infantile spasms     | HP:0001250 <i>or</i> HP:0002391 | 78.00%    |
| Mental retardation                      | HP:0001249                      | 53.00%    |
| Multiple bilateral renal angiomyolipoma | HP:0006772                      | 52.00%    |
| Cardiac rhabdomyoma                     | HP:0009729                      | 50.00%    |
| Subcutaneous nodules                    | HP:0001482                      | typical   |
| Retinal hamartoma                       | HP:0009554                      | 50.00%    |
| Behavioral disturbances                 | HP:0000715                      | 50.00%    |
| dental enamel pit                       | HP:0009722                      | 48.00%    |
| Subungual fibromata                     | HP:0009724                      | 32.00%    |
| Shagreen patch                          | HP:0009721                      | 31.00%    |
| Achromatic retinal patches              | HP:0009727                      | 13.00%    |
| Subependymal giant-cell astrocytoma     | HP:0009717                      | 10.00%    |
| Renal cysts                             | HP:0000107                      | 10.00%    |
| Renal cell carcinoma                    | HP:0005584                      | rare      |

Inheritance: Autosomal dominant

Table S43: **Tuberous Sclerosis** [MIM 191100]. Feature frequencies according to [5].

| HPO Term                                | Term ID    | Frequency |
|-----------------------------------------|------------|-----------|
| Cerebellar hemangioblastoma             | HP:0006880 | 59%       |
| Retinal capillary hemangioma            | HP:0009711 | 59%       |
| Pancreatic cysts                        | HP:0001737 | 40%       |
| Multiple renal cysts                    | HP:0005562 | 28%       |
| Renal cell carcinoma                    | HP:0005584 | 28%       |
| Papillary cystadenoma of the epididymis | HP:0009715 | 26%       |
| Spinal hemangioblastoma                 | HP:0009713 | 13%       |
| Pheochromocytoma                        | HP:0002666 | 13%       |

Inheritance: autosomal dominant

Table S44: **von Hippel Lindau Syndrome [MIM 193300]**. Feature frequencies according to [24] and [33].

| HPO Term                                                          | Term ID                          | Frequency  |
|-------------------------------------------------------------------|----------------------------------|------------|
| Cerebellar malformation                                           | HP:0002438                       | 100.00%    |
| Type II lissencephaly                                             | HP:0007260                       | 100.00%    |
| Retinal malformation                                              | HP:0007901                       | 100.00%    |
| Congenital muscular dystrophy                                     | HP:0003741                       | 100.00%    |
| Ventriculomegaly                                                  | HP:0002189                       | 95.00%     |
| Anterior chamber malformation                                     | HP:0007699                       | 91.00%     |
| Male: Abnormalities of the genital tract                          | HP:0000078                       | 65.00%     |
| Hydrocephaly                                                      | HP:0000238                       | 53.00%     |
| Microphthalmos                                                    | HP:0000568                       | 53.00%     |
| Dandy-Walker malformation                                         | HP:0001305                       | 53.00%     |
| Congenital contractures                                           | HP:0002803                       | 43.00%     |
| Thick cerebral cortex                                             | HP:0006891                       | main       |
| Detached retina <i>and</i> Retinal dysplasia                      | HP:0000541 <i>and</i> HP:0007973 | main       |
| Agenesis of corpus callosum <i>or</i> Hypoplastic corpus callosum | HP:0001274 <i>or</i> HP:0002079  | main       |
| Absent septum pellucidum                                          | HP:0006891                       | main       |
| Occipital encephalocele                                           | HP:0002085                       | 24.00%     |
| Coloboma                                                          | HP:0000589                       | 24.00%     |
| Microcephaly                                                      | HP:0000252                       | 16.00%     |
| Cleft lip/palate                                                  | HP:0000202                       | 14.00%     |
| External auditory canal atresia                                   | HP:0000413                       | occasional |
| Megalocornea                                                      | HP:0000485                       | occasional |
| Imperforate anus                                                  | HP:0001550                       | occasional |
| Renal dysplasia                                                   | HP:0000110                       | occasional |
| Microtia                                                          | HP:0000393                       | occasional |

Inheritance: Autosomal recessive

Table S45: **Walker-Warburg syndrome** [MIM 236670]. Feature frequencies according to [3].

## References

- [1] Benjamini, Y. and Hochberg, Y. (1995). Controlling the false discovery rate: a practical and powerful approach to multiple testing. *Journal of the Royal Statistical Society, Series B*, 57, 289–300.
- [2] R Development Core Team. (2009). *R: A Language and Environment for Statistical Computing*. R Foundation for Statistical Computing, Vienna, Austria. ISBN 3-900051-07-0.
- [3] Jones KL. *Smith’s Recognizable Patterns of Human Malformation* 6th edn (Saunders, Philadelphia, 2005)
- [4] Lanzi G, Fazzi E, D’Arrigo S (2002) Aicardi-Goutières syndrome: a description of 21 new cases and a comparison with the literature. *Eur J Paediatr Neurol.* **6 Suppl A**:A9-22.
- [5] Rice G et al. (2007) Clinical and molecular phenotype of Aicardi-Goutieres syndrome. *Am J Hum Genet.* **81**:713-25.
- [6] Beales PL, Elcioglu N, Woolf AS, Parker D, Flintner FA (1999) New criteria for improved diagnosis of Bardet-Biedl syndrome: results of a population survey. *J Med Genet.* **36**:437–46.
- [7] Lin AE, Gorlin RJ, Lurie IW, Brunner HG, van der Burgt I, Naumchik IV, Rumyantseva NV, Stengel-Rutkowski S, Rosenbaum K, Meinecke P, Muller D (1995) Further delineation of the branchio-oculo-facial syndrome. *Am. J. Med. Genet.* **56**: 42-59.
- [8] Janssens K, Vanhoenacker F, Bonduelle M, Verbruggen L, Van Maldergem L, Ralston S, Guanabens N, Migone N, Wientroub S, Divizia MT, Bergmann C, Bennett C, Simsek S, Melancon S, Cundy T, Van Hul W (2006) Camurati-Engelmann disease: review of the clinical, radiological, and molecular data of 24 families and implications for diagnosis and treatment. *J. Med. Genet.* **43**: 1–11.
- [9] Young ID (1995) Coffin-Lowry syndrome. *in*: Donnai D, Winter RM. *Congenital Malformation Syndromes* (Chapman & Hall Medical, London, 1995).
- [10] Levy P, Baraitser M (1995) Coffin-Siris syndrome. *in*: Donnai D, Winter RM. *Congenital Malformation Syndromes* (Chapman & Hall Medical, London, 1995).
- [11] Chandler KE, Kidd A, Al-Gazali L, Kolehmainen J, Lehesjoki AE, Black GC, Clayton-Smith J (2003) Diagnostic criteria, clinical characteristics, and natural history of Cohen syndrome. *J Med Genet.* **40**:233–41.
- [12] Lynch SA, Wang Y, Strachan T, Burn J, Lindsay S (2000) Autosomal dominant sacral agenesis: Currarino syndrome. *J Med Genet.* **37**:561–6.
- [13] Köchling J, Karbasiyan M, Reis A (2001) Spectrum of mutations and genotype-phenotype analysis in Currarino syndrome. *Eur J Hum Genet.* **9**:599–605.

- [14] Porteous MEM, Goudie DR (1995) Aarskog Syndrome. *in*: Donnai D, Winter RM. Congenital Malformation Syndromes (Chapman & Hall Medical, London, 1995).
- [15] Stevenson DA, Carey JC, Palumbos J, Rutherford A, Dolcourt J, Bamshad MJ (2006) Clinical characteristics and natural history of Freeman-Sheldon syndrome. *Pediatrics*. **117**:754–62.
- [16] Hurst JA, Hall CM, Baraitser M (1995) Holt-Oram Syndrome *in*: Donnai D, Winter RM. Congenital Malformation Syndromes (Chapman & Hall Medical, London, 1995).
- [17] Salonen R, Herva R. (1995) Hydrolethalus syndrome *in*: Donnai D, Winter RM. Congenital Malformation Syndromes (Chapman & Hall Medical, London, 1995).
- [18] Johnston JJ et al. (2005) Molecular and clinical analyses of Greig cephalopolysyndactyly and Pallister-Hall syndromes: robust phenotype prediction from the type and position of *GLI3* mutations. *Am J Hum Genet*. **76**:609-22.
- [19] Wessels MW, Brooks AS, Hoogeboom J, Niermeijer MF, Willems PJ (2002) Kabuki syndrome: a review study of three hundred patients. *Clinical Dysmorphology* **11**:95–102.
- [20] Turnpenny PD, Dakwar RA, Boulos FN (1995) Kyphomelic Dysplasia. *in*: Donnai D, Winter RM. Congenital Malformation Syndromes (Chapman & Hall Medical, London, 1995).
- [21] Mowat DR, Wilson MJ, Goossens (2003) Mowat-Wilson syndrome. *J Med Genet* **40**:305–310.
- [22] Thompson E, Donnai D, Baraitser M, Hall CS, Pembrey ME, Fixsen J (1995) Multiple pterygium syndrome: evolution of the phenotype. *in*: Donnai D, Winter RM. Congenital Malformation Syndromes (Chapman & Hall Medical, London, 1995).
- [23] Sweeney E, Fryer A, Mountford R, Green A, McIntosh I (2003) Nail patella syndrome: a review of the phenotype aided by developmental biology. *J Med Genet*. **40**:153–62.
- [24] Rimoin DL, Connor JM, Pyeritz RE, Korf BR. Emery and Rimoin’s Principles and Practice of Medical Genetics, 4th ed, (Churchill Livingstone, New York, 2002).
- [25] Firth HV, Hurst JA, Hall JG. Oxford Desk Reference Clinical Genetics (Oxford University Press, Oxford, 2005).
- [26] Evans DG, Huson SM, Donnai D, Neary W, Blair V, Newton V, Harris R (1992) A clinical study of type 2 neurofibromatosis. *Q J Med* **84**:603–18.
- [27] Froster UG (1995) Popliteal Pterygium syndrome *in*: Donnai D, Winter RM. Congenital Malformation Syndromes (Chapman & Hall Medical, London, 1995).



- [28] Robinson PN, Neumann LM, Demuth S, Enders H, Jung U, König R, Mitulla, B, Müller D, Muschke P, Pfeiffer L, Prager B, Somer M, Tinschert S (2005) Shprintzen-Goldberg syndrome: fourteen new patients and a clinical analysis. *Am. J. Med. Genet.* **135A**:251–262.
- [29] Kelley RI, Hennekam RCM (2000) The Smith-Lemli-Opitz Syndrome. *J. Med. Genet.* **37**:321–335.
- [30] Majewski, F.; Kuster, W.; ter Haar, B.; Goecke, T (1985) Aplasia of tibia with split-hand/split-foot deformity: report of six families with 35 cases and considerations about variability and penetrance. *Hum. Genet.* **70**:136-147.
- [31] Powell CM, Michaelis RC (1999) Townes-Brocks syndrome. *J Med Genet* **36**:89–93.
- [32] Katsanis SH, Cutting GR (Updated October 27, 2006). Treacher Collins Syndrome . In: GeneReviews at GeneTests: Medical Genetics Information Resource (database online). Copyright, University of Washington, Seattle. 1997-2009. Available at <http://www.genetests.org>. Accessed 26 January, 2009.
- [33] Maher ER, Yates JR, Harries R, Benjamin C, Harris R, Moore AT, Ferguson-Smith MA (1990) Clinical features and natural history of von Hippel-Lindau disease. *Q J Med* **77**:1151-63.
